## **Sodium regulates PLC and IP<sub>3</sub>R-mediated calcium signalling in invasive breast cancer cells**

Andrew D. James<sup>1,2</sup>, Katherine P. Unthank<sup>1</sup>, Isobel Jones<sup>1</sup>, Rebecca E. Sizer<sup>1</sup>, Sangeeta Chawla<sup>1,2</sup>, Gareth J.O. Evans<sup>1,2</sup>, William J. Brackenbury<sup>1,2\*</sup>

<sup>1</sup>Department of Biology, University of York, York, UK

<sup>2</sup>York Biomedical Research Institute, University of York, York, UK

\*Corresponding author

William J. Brackenbury, PhD

York Biomedical Research Institute

Department of Biology

University of York, Heslington, York, YO10 5DD, UK

Telephone: +44 (0) 1904 328284

Email: [william.brackenbury@york.ac.uk](mailto:william.brackenbury@york.ac.uk)

## Abstract

Intracellular  $\text{Ca}^{2+}$  signalling and  $\text{Na}^+$  homeostasis are inextricably linked via ion channels and co-transporters, with alterations in the concentration of one ion having profound effects on the other. Evidence indicates that intracellular  $\text{Na}^+$  concentration ( $[\text{Na}^+]_i$ ) is elevated in breast tumours, and that aberrant  $\text{Ca}^{2+}$  signalling regulates numerous key cancer hallmark processes. The present study therefore aimed to determine the effects of  $\text{Na}^+$  depletion on intracellular  $\text{Ca}^{2+}$  handling in metastatic breast cancer cell lines. The relationship between  $\text{Na}^+$  and  $\text{Ca}^{2+}$  was probed using fura-2 and SBFI fluorescence imaging and replacement of extracellular  $\text{Na}^+$  with equimolar N-methyl-D-glucamine ( $0\text{Na}^+/\text{NMDG}$ ) or choline chloride ( $0\text{Na}^+/\text{ChoCl}$ ). In triple-negative MDA-MB-231 cells and Her2+ SKBR3 cells, but not ER+ MCF7 cells,  $0\text{Na}^+/\text{NMDG}$  and  $0\text{Na}^+/\text{ChoCl}$  resulted in a slow, sustained depletion in  $[\text{Na}^+]_i$  that was accompanied by a rapid and sustained increase in intracellular  $\text{Ca}^{2+}$  concentration ( $[\text{Ca}^{2+}]_i$ ). Application of  $\text{La}^{3+}$  in nominal  $\text{Ca}^{2+}$ -free conditions had no effect on this response, ruling out reverse-mode NCX activity and  $\text{Ca}^{2+}$  entry channels. Moreover, the  $\text{Na}^+$ -linked  $[\text{Ca}^{2+}]_i$  increase was independent of membrane potential hyperpolarisation (NS-1619), but was inhibited by pharmacological blockade of  $\text{IP}_3$  receptors (2-APB), phospholipase C (PLC, U73122) or following depletion of endoplasmic reticulum  $\text{Ca}^{2+}$  stores (cyclopiazonic acid). Thus,  $\text{Na}^+$  is linked to PLC/ $\text{IP}_3$ -mediated activation of endoplasmic reticulum  $\text{Ca}^{2+}$  release in metastatic breast cancer cells and this may have an important role in breast tumours where  $[\text{Na}^+]_i$  is perturbed.

Keywords: sodium, breast cancer, calcium signalling, GPCR,  $\text{IP}_3$  receptor, ion homeostasis

Running title:  $\text{Na}^+$  regulates  $\text{Ca}^{2+}$  signalling in breast cancer

## Introduction

Early detection has played an important role for timely clinical intervention in breast cancer; however, development of novel therapies which selectively kill malignant cells remains a central research goal. Key hallmarks of cancer include unlimited replicative capacity, self-sufficiency of growth, apoptosis resistance, angiogenesis and ultimately tissue invasion (Hanahan & Weinberg, 2016). Importantly, intracellular ion signalling pathways (in particular  $\text{Ca}^{2+}$  and  $\text{Na}^+$  signalling) play a key role in regulating many of these hallmark processes in breast cancer (Leslie *et al.*, 2019; Bruce & James, 2020; Capatina *et al.*, 2022; Yang & Brackenbury, 2022), and thus ion signalling may be a novel therapeutic locus.

Intracellular  $[\text{Na}^+]_i$  ( $[\text{Na}^+]_i$ ) and intracellular  $[\text{Ca}^{2+}]_i$  ( $[\text{Ca}^{2+}]_i$ ) signalling is achieved via a multiplicity of ion channels and transporters located both at the plasma membrane and on intracellular organelles. These channels harness the electrochemical gradient of  $\text{Na}^+$  and  $\text{Ca}^{2+}$  across cell membranes to achieve their function, with  $[\text{Na}^+]_i$  and  $[\text{Ca}^{2+}]_i$  typically tightly regulated by various ion transporters (Bruce, 2018; Leslie *et al.*, 2019). Importantly,  $\text{Ca}^{2+}$  and  $\text{Na}^+$  signalling are inextricably linked via mechanisms mutually regulated by both ions, such as the plasma membrane  $\text{Na}^+/\text{Ca}^{2+}$  exchanger (NCX; which is responsible for bulk export of  $\text{Ca}^{2+}$  from the cytosol) and the mitochondrial  $\text{Na}^+/\text{Ca}^{2+}/\text{Li}^+$  exchanger (which regulates mitochondrial  $\text{Ca}^{2+}$  and  $\text{Na}^+$  and thus bioenergetics (Hernansanz-Agustín *et al.*, 2020)). Thus, changes in how the cell handles one ion would be expected to impact upon the other. Moreover, the interplay between  $[\text{Na}^+]_i$  and  $[\text{Ca}^{2+}]_i$  handling has important implications in breast cancer since  $[\text{Na}^+]_i$  is elevated in malignant breast cancer cells, particularly in those exhibiting aberrant  $\text{Na}^+$  channel expression (Cameron *et al.*, 1980; Ouwerkerk *et al.*, 2007; Yang *et al.*, 2020; James *et al.*, 2022).

Emerging evidence implicates altered  $\text{Na}^+$  and  $\text{Ca}^{2+}$  signalling in the progression of breast cancer (Leslie *et al.*, 2019; Bruce & James, 2020). For example, aberrantly expressed voltage-gated  $\text{Na}^+$  channels (VGSCs) drive metastasis (Nelson *et al.*, 2015), elevations in intracellular  $\text{Na}^+$  correlate with malignancy and treatment response (Ouwerkerk *et al.*, 2007; James *et al.*, 2022), and upregulation of numerous  $\text{Ca}^{2+}$  channels and ATPases (and thus alterations in  $\text{Ca}^{2+}$  handling) are linked with breast cancer progression and poor prognosis (VanHouten *et al.*, 2010; Feng *et al.*, 2010; Middelbeek *et al.*, 2012; Davis *et al.*, 2014; Jeong *et al.*, 2016). The apparent elevation in  $[\text{Na}^+]_i$  exhibited by breast cancer cells might be expected to affect  $\text{Na}^+$ -dependent  $\text{Ca}^{2+}$  handling mechanisms; for example, NCX, which can operate in reverse,  $\text{Ca}^{2+}$  entry mode following changes in  $[\text{Na}^+]_i$  (Pappalardo *et al.*, 2014; Verkhratsky *et al.*, 2018). Nevertheless, the interplay between  $\text{Na}^+$  and  $\text{Ca}^{2+}$  handling in the context of cancer is poorly understood.

The present study aimed to determine the effects of  $\text{Na}^+$  depletion on intracellular  $\text{Ca}^{2+}$  handling in metastatic breast cancer cell lines in order to probe the relationship between  $\text{Na}^+$  and  $\text{Ca}^{2+}$  in breast cancer. A commonly recognised method to probe the role of  $\text{Na}^+$  transport in cell physiology is by replacement of extracellular  $\text{Na}^+$  with equimolar N-methyl-D-glucamine ( $0\text{Na}^+/\text{NMDG}$ ) or choline chloride ( $0\text{Na}^+/\text{ChoCl}$ ). These replacement cations maintain the osmotic balance across the cell membrane, yet are not transported via  $\text{Na}^+$  channels or transporters. Breast cancer cells can be subdivided into three main categories based on expression of the estrogen receptor (ER), progesterone receptor and human epidermal growth factor 2 (Her2). In triple-negative MDA-MB-231 cells (lacking all three receptors) and Her2+ SKBR3 cells, removal of  $\text{Na}^+$  from the extracellular space led to a slow, sustained depletion in  $[\text{Na}^+]_i$  that was accompanied by a rapid and sustained increase in intracellular  $[\text{Ca}^{2+}]_i$ . Interestingly, this response was absent in ER+ MCF7 cells. The observed  $[\text{Ca}^{2+}]_i$  transient was not due to  $\text{Ca}^{2+}$  entry from the extracellular space, ruling out

reverse-mode NCX activity. Moreover, it was independent of membrane potential ( $V_m$ ) and was inhibited by depletion of the endoplasmic reticulum  $Ca^{2+}$  store or by pharmacological blockade of inositol (1,4,5) trisphosphate ( $IP_3$ ) receptors ( $IP_3Rs$ ) or phospholipase C (PLC). These data reveal a previously unreported  $Na^+$ -linked activation of endoplasmic reticulum  $Ca^{2+}$  release in metastatic breast cancer cells, which may have an important role in breast tumours where  $[Na^+]_i$  is elevated or perturbed. Moreover, the dramatic  $Ca^{2+}$  release observed upon  $Na^+$  depletion serves as a cautionary note for those utilising similar  $Na^+$  replacement methods to study the role of  $Na^+$  transport in cellular processes.

## Materials and methods

### ***Cell Culture***

Cells were cultured at 37 °C in a humidified atmosphere of air/CO<sub>2</sub> (95:5%) in Dulbecco's modified Eagle's medium (DMEM 219690-35, Thermo Fisher Scientific) supplemented with 4 mM L-glutamine and 5% foetal bovine serum. Cells were routinely tested for mycoplasma using the DAPI method (Uphoff *et al.*, 1992). MDA-MB-231 and MCF-7 cells were gifts from M. Djamgoz (Imperial College London) and SKBR3 cells were a gift from J. Rae (University of Michigan).

### ***Fura-2 and SBFI fluorescence microscopy***

Cells were seeded onto glass coverslips and allowed to adhere overnight. Cells were loaded with either fura-2 AM (4 µM) or SBFI AM (4 µM) in HEPES-buffered physiological saline solution (HEPES-PSS: 144 mM NaCl, 5.4 mM KCl, 1 mM MgCl<sub>2</sub>, 1.28 mM CaCl<sub>2</sub>, 5 mM HEPES and 5.6 mM glucose, pH 7.2) with 0.08% Pluronic F-127 at room temperature (fura-2 AM, 40 min; SBFI AM, 2 hours). Cells were then rinsed once with HEPES-PSS and incubated in dye-free HEPES-PSS to allow uncleaved dye to re-equilibrate (fura-2 AM, 20 min; SBFI AM, 40 min). Following loading, coverslips were mounted within a perfusion chamber (RC26G, Warner Instruments) fitted to an imaging system comprising an Eclipse TE-200 inverted microscope (Nikon), a Plan Fluor ELWD 20x/0.45 Ph1 objective (Nikon Corporation, Tokyo, Japan) and a Rolera XR 12 Bit Fast 1394 CCD camera (QImaging, Surrey, British Columbia) controlled by SimplePCI software (Hamamatsu). Excitation (340 and 380 nm, 50 ms exposure, mercury bulb) and emission light were separated using a 400 DCLP dichroic with a D510/80m filter. Cells were perfused with HEPES-PSS using a gravity-fed perfusion system at a continuous rate of ~2 ml/min. Na<sup>+</sup>-free HEPES PSS was prepared

as for HEPES-PSS above but with NaCl replaced with equimolar N-methyl-D-glucamine (0Na<sup>+</sup>/NMDG) or choline chloride (0Na<sup>+</sup>/ChoCl). Nominal Ca<sup>2+</sup>-free HEPES PSS was prepared as for HEPES-PSS above, omitting CaCl<sub>2</sub>.

### ***Drug preparation***

Stocks of NS-1619, 2-APB, dantrolene, cyclopiazonic acid (CPA), and ionomycin were prepared in DMSO. The final DMSO concentration in working solutions was 0.1%. Stocks of La<sup>3+</sup> were prepared using ultrapure water. Drugs were diluted into HEPES-PSS immediately prior to use.

### ***Measurement of [Ca<sup>2+</sup>]<sub>i</sub> responses***

Changes in [Ca<sup>2+</sup>]<sub>i</sub> in response to treatment were measured as either the maximum fura-2 ratio change ( $\Delta R_{\max}$ ) or the area under the curve (AUC). The fura-2 fluorescence ratios for each trace were first normalised to the ratio at time 0 ( $R/R_0$ ) to control for variability in starting ratio between cells. To obtain a pretreatment baseline, the average ratio across the 6 timepoints (30 seconds at an acquisition interval of 5 seconds) immediately prior to treatment application was determined.  $\Delta R_{\max}$  was defined as the maximum increase from this baseline during the treatment period. The AUC was defined as the area under the curve during the entire treatment period (i.e. 10 min) in fura-2 ratio unit seconds (R.s). Where no [Ca<sup>2+</sup>]<sub>i</sub> response was elicited in response to treatment, cells were stimulated with ionomycin (3  $\mu$ M) to ensure a change in [Ca<sup>2+</sup>]<sub>i</sub> could be measured. Cells in which no fura-2 fluorescence change was observed were excluded from analysis.

### ***Data analysis***

Data analysis and statistical comparisons were performed using Microsoft Excel and GraphPad Prism 9. Statistical comparisons were performed using a nested t-test for side-by-side comparisons and a nested one-way ANOVA with post-hoc Tukey test for multiple comparisons. Within each figure, nested data are presented from individual experiments (3–6 independent repeats, each containing 12-40 independent cells) and the individual experimental means  $\pm$  S.E.M.



## Results

### ***Na<sup>+</sup> depletion drives an increase in [Ca<sup>2+</sup>]<sub>i</sub> in breast cancer cells***

Metastatic breast cancer cells exhibit elevated [Na<sup>+</sup>]<sub>i</sub> (Leslie *et al.*, 2019) that may regulate reverse-mode (Ca<sup>2+</sup>-entry) NCX activity (Pappalardo *et al.*, 2014; Verkhatsky *et al.*, 2018) in these cells. To assess the effects of lowering extracellular Na<sup>+</sup> on [Ca<sup>2+</sup>]<sub>i</sub>, MDA-MB-231 cells were loaded with fura-2 AM (4 μM) and perfused with sequential pulses of HEPES-PSS where Na<sup>+</sup> had been replaced with either equimolar N-methyl D glucamine (0Na<sup>+</sup>/NMDG) or equimolar choline chloride (0Na<sup>+</sup>/ChoCl) to remove extracellular Na<sup>+</sup> while maintaining osmotic balance. Fura-2 fluorescence imaging revealed that, using either manoeuvre, removal of extracellular Na<sup>+</sup> resulted in a steep increase in [Ca<sup>2+</sup>]<sub>i</sub> that returned to baseline upon reperfusion with standard Na<sup>+</sup>-containing HEPES-PSS (Figures 1Ai and 1Bi). In parallel experiments, SBFI fluorescence imaging revealed that both 0Na<sup>+</sup>/NMDG and 0Na<sup>+</sup>/ChoCl resulted in a concomitant depletion of [Na<sup>+</sup>]<sub>i</sub>, suggesting a link between [Na<sup>+</sup>]<sub>i</sub> depletion and subsequent [Ca<sup>2+</sup>]<sub>i</sub>. Interestingly, perfusion of 0Na<sup>+</sup>/NMDG had no effect on [Ca<sup>2+</sup>]<sub>i</sub> in the ER<sup>+</sup> breast cancer cell line MCF7 (Figure 1C), but induced a [Ca<sup>2+</sup>]<sub>i</sub> transient in the Her2<sup>+</sup> breast cancer cell line SKBR3 (Figure 1D), suggesting that this mechanism is present only in certain breast cancer cell lines.

### ***The [Ca<sup>2+</sup>]<sub>i</sub> increase induced by Na<sup>+</sup>-depletion is not due to Ca<sup>2+</sup> influx from the extracellular space***

We reasoned that the increase in [Ca<sup>2+</sup>]<sub>i</sub> observed under 0Na<sup>+</sup> conditions likely originated from one of two compartments: Ca<sup>2+</sup> release from intracellular stores (most likely the endoplasmic reticulum) or Ca<sup>2+</sup> influx from the extracellular space. To determine whether Ca<sup>2+</sup> influx from the extracellular space contributed to the [Ca<sup>2+</sup>]<sub>i</sub> responses observed, MDA-

MB-231 cells were perfused with  $0\text{Na}^+$ /NMDG in nominal  $\text{Ca}^{2+}$ -free conditions with  $\text{La}^{3+}$  (1 mM);  $\text{La}^{3+}$  in the millimolar range is a known inhibitor of both  $\text{Ca}^{2+}$  entry from and  $\text{Ca}^{2+}$  efflux to the extracellular space (James *et al.*, 2013).  $\text{La}^{3+}$  was applied for 5 minutes prior to application of  $0\text{Na}^+$ /NMDG (Figure 2B). Compared with control cells (Figure 1A),  $\text{La}^{3+}$  had no effect on the  $[\text{Ca}^{2+}]_i$  transients elicited following  $0\text{Na}^+$ /NMDG application, as measured by either the maximum change in fura-2 ratio ( $\Delta R_{\text{max}}$ ) or the area under the curve (AUC). These results indicate that  $\text{Ca}^{2+}$  influx via agonist-induced and store-operated  $\text{Ca}^{2+}$  entry mechanisms plays no role in the  $[\text{Ca}^{2+}]_i$  transients induced following application of  $0\text{Na}^+$ /NMDG, and that the provenance of this  $\text{Ca}^{2+}$  response must be from some compartment other than the extracellular space.

***Elevations in  $[\text{Ca}^{2+}]_i$  induced by  $\text{Na}^+$ -depletion are not due to changes in membrane potential***

Manoeuvres that deplete extracellular  $\text{Na}^+$  such as  $0\text{Na}^+$ /NMDG are known to cause  $V_m$  hyperpolarisation (Yang *et al.*, 2020), thereby altering ion flux across the plasma membrane. Moreover,  $V_m$  hyperpolarization would increase the driving force for  $\text{Ca}^{2+}$  entry. To determine whether such changes in  $V_m$  led to the  $[\text{Ca}^{2+}]_i$  transient observed under  $0\text{Na}^+$ /NMDG conditions, we applied the the large-conductance  $\text{Ca}^{2+}$ -activated  $\text{K}^+$  channel ( $\text{K}_{\text{Ca}1.1}$ ) channel activator NS-1619 at a concentration (10  $\mu\text{M}$ ) that hyperpolarises  $V_m$  in MDA-MB-231 cells to a similar degree to  $0\text{Na}^+$ /NMDG (Yang *et al.*, 2020). Similar to control cells (Figure 3A), MDA-MB-231 cells treated with NS-1619 (10  $\mu\text{M}$ ) showed no change in  $[\text{Ca}^{2+}]_i$ . However, an increased concentration of NS-1619 (40  $\mu\text{M}$ ) elicited an increase in  $[\text{Ca}^{2+}]_i$  that was significantly greater than any change observed in either the control cells ( $P < 0.01$  for both  $\Delta R_{\text{max}}$  and AUC) or those treated with 10  $\mu\text{M}$  NS-1619 ( $P < 0.01$  for both  $\Delta R_{\text{max}}$  and AUC), indicating that dramatic changes in  $V_m$  can indeed alter  $[\text{Ca}^{2+}]_i$ . Importantly, the effects of 40  $\mu\text{M}$  NS-1619 on  $[\text{Ca}^{2+}]_i$  were abolished following pretreatment with  $\text{La}^{3+}$  (1 mM,  $P < 0.05$  for

both  $\Delta R_{max}$  and AUC), indicating that the NS-1619 induced rise was due to  $Ca^{2+}$  influx from the extracellular space. Given that  $Ca^{2+}$  influx plays no role in the  $[Ca^{2+}]_i$  transients observed following application of  $0Na^+/NMDG$  (Figure 2), these results suggest that neither  $Ca^{2+}$  influx nor hyperpolarisation of  $V_m$  play a role in changes in  $[Ca^{2+}]_i$  induced by application  $0Na^+/NMDG$ .

### ***Depletion of ER $Ca^{2+}$ stores inhibits the increase in $[Ca^{2+}]_i$ induced by $0Na^+/NMDG$***

Having ruled out  $Ca^{2+}$  influx as being responsible for the  $[Ca^{2+}]_i$  transients induced following application of  $0Na^+/NMDG$ , we tested whether depletion of the intracellular  $Ca^{2+}$  stores within the endoplasmic reticulum affected the observed rises in  $[Ca^{2+}]_i$ . To deplete endoplasmic reticulum  $Ca^{2+}$  stores, cells were treated with the sarcoplasmic/endoplasmic reticulum  $Ca^{2+}$  ATPase (SERCA) inhibitor cyclopiazonic acid (CPA, 30  $\mu M$ ) in nominal  $Ca^{2+}$ -free conditions (to prevent store-operated  $Ca^{2+}$  entry), resulting in a transient leak of  $Ca^{2+}$  from the endoplasmic reticulum that was subsequently cleared from the cell (Figure 4B), presumably by the plasma membrane  $Ca^{2+}$  ATPase (James *et al.*, 2015). These experiments were performed without EGTA since it was observed that inclusion of EGTA (1 mM) within the  $Ca^{2+}$ -free buffer inhibited the  $[Ca^{2+}]_i$  increases elicited by  $0Na^+/NMDG$  (Supplementary Figure 1). Compared with control cells, (Figure 4A), pretreatment with CPA completely abolished the increase in  $[Ca^{2+}]_i$  elicited by  $0Na^+/NMDG$  (Figure 4B, 4C and 4D;  $P < 0.01$  for both  $\Delta R_{max}$  and AUC). These results indicate that the  $0Na^+/NMDG$ -induced  $[Ca^{2+}]_i$  transient is likely due to release of  $Ca^{2+}$  from the intracellular endoplasmic reticulum  $Ca^{2+}$  stores.

***Na<sup>+</sup> depletion drives increases in [Ca<sup>2+</sup>]<sub>i</sub> via a G-protein coupled receptor/IP<sub>3</sub> receptor-mediated mechanism***

Given the evidence implicating endoplasmic reticulum Ca<sup>2+</sup> release in the changes in [Ca<sup>2+</sup>]<sub>i</sub> observed upon application of 0Na<sup>+</sup>/NMDG, we next sought to determine the key molecular players responsible. Ca<sup>2+</sup> is classically released from the endoplasmic reticulum via inositol (1,4,5) triphosphate receptors (IP<sub>3</sub>Rs) and ryanodine receptors (RyRs) (Berridge *et al.*, 2000). To determine which of these release mechanisms was responsible for [Ca<sup>2+</sup>]<sub>i</sub> transients upon application of 0Na<sup>+</sup>/NMDG, we perfused MDA-MB-231 cells with 0Na<sup>+</sup>/NMDG following pretreatment (10 min) with either the IP<sub>3</sub>R inhibitor 2-APB (50 μM) or the RyR inhibitor dantrolene (10 μM). Compared to control cells (Figures 5Ai and 5Bi), 2-APB significantly reduced the [Ca<sup>2+</sup>]<sub>i</sub> transient induced by 0Na<sup>+</sup>/NMDG (Figures 5Aii, Aiii and Aiv; ΔRmax, P<0.05; AUC, P<0.001), whereas dantrolene (10 μM, Figure 5Bii) had no effect (Figure 5Biii and 5Biv). These data suggest that Na<sup>+</sup> depletion induces Ca<sup>2+</sup> release from the endoplasmic reticulum via IP<sub>3</sub>Rs.

IP<sub>3</sub>Rs are classically activated by upstream G-protein coupled receptor signalling, with GPCRs of the G<sub>αq/11</sub> family activating phospholipase C (PLC), which then cleaves membrane-bound phosphatidylinositol 4,5-bisphosphate (PIP<sub>2</sub>) to form the second messengers IP<sub>3</sub> and diacylglycerol (DAG) (Patterson *et al.*, 2005). To determine whether application of 0Na<sup>+</sup>/NMDG influenced IP<sub>3</sub>Rs via GPCR-mediated activation of PLC, we applied 0Na<sup>+</sup>/NMDG following pretreatment with the aminosteroid PLC inhibitor U73122 (2 μM, (Yule & Williams, 1992)). Compared with control cells (Figure 5Ci), U73122 completely abolished the increase in [Ca<sup>2+</sup>]<sub>i</sub> observed following application of 0Na<sup>+</sup>/NMDG (Figure 5Cii, Ciii and Civ; P<0.001 for both ΔRmax and AUC), indicating that PLC activation, potentially via GPCRs, is critical to this Na<sup>+</sup>-controlled ER Ca<sup>2+</sup> release mechanism.

## Discussion

The present study is the first to describe a relationship in metastatic breast cancer cells between  $\text{Na}^+$  depletion and a subsequent dramatic rise in  $[\text{Ca}^{2+}]_i$  that is mediated by a PLC- and  $\text{IP}_3\text{R}$ -dependent mechanism. These results provide further evidence of an interplay between  $\text{Ca}^{2+}$  and  $\text{Na}^+$  signalling in breast cancer cells that may have important implications for understanding cancer cell physiology. Through pharmacological manoeuvres we rule out any role for reverse-mode NCX activity,  $V_m$  and  $\text{Ca}^{2+}$  entry in this response. We also found that CPA and EGTA abolished the  $[\text{Ca}^{2+}]_i$  transients elicited by  $0\text{Na}^+/\text{NMDG}$  application; EGTA has previously been shown to inhibit mobilisation of  $\text{IP}_3$ -sensitive  $\text{Ca}^{2+}$  stores (Finch & Goldin, 1994), while CPA is a well characterised SERCA blocker, providing further indirect evidence that this phenomenon was mediated by an  $\text{IP}_3\text{R}$ -mediated endoplasmic reticulum  $\text{Ca}^{2+}$  release mechanism. Furthermore, while  $[\text{Ca}^{2+}]_i$  transients were observed upon  $\text{Na}^+$  depletion in MDA-MB-231 cells and SKBR3 cells, no such response was observed in MCF7 cells. This indicates that the  $\text{Na}^+$ -dependent  $\text{Ca}^{2+}$  increase described may be breast cancer cell and/or subtype specific. Further research should explore the reason for this difference between cell lines, as this would provide important insights into the interplay between  $\text{Na}^+$  and  $\text{Ca}^{2+}$  signalling in tumour cells of different subtypes.

The present study establishes that  $\text{Na}^+$  regulates a PLC/ $\text{IP}_3$ -dependent  $\text{Ca}^{2+}$  release in metastatic breast cancer cells; however, the molecular identity of the  $\text{Na}^+$  'sensor' that initiates this event remains unknown. Interestingly,  $\text{Na}^+$  has been described as an endogenous regulator of Class A GPCRs (White *et al.*, 2018) via allosteric regulation of agonist binding (Katritch *et al.*, 2014; Zarzycka *et al.*, 2019; Agasid *et al.*, 2021); while we cannot presently rule out whether it is the depletion of cytosolic  $[\text{Na}^+]$  or removal of

extracellular  $\text{Na}^+$  that induces this  $[\text{Ca}^{2+}]_i$  transient in the current study, these previous studies provide a strong potential candidate for the underlying trigger mechanism. Indeed, in these studies,  $\text{Na}^+$  depletion appeared to increase basal GPCR activity in the absence of agonist, suggesting that  $\text{Na}^+$  may act as a negative modulator of GPCR activation (Katritch *et al.*, 2014; Zarzycka *et al.*, 2019; Agasid *et al.*, 2021). Interestingly, recently obtained X-ray structures of Class A GPCRs have identified a  $\text{Na}^+$  binding site in the vicinity of the agonist binding site that is exposed to the extracellular space (Yuan *et al.*, 2013; Katritch *et al.*, 2014). Moreover, computer simulations have suggested Class A GPCRs exhibit a transient water-filled channel connecting this  $\text{Na}^+$  binding site to the cytoplasm (Yuan *et al.*, 2014, 2015; Vickery *et al.*, 2018; Hu *et al.*, 2019).  $\text{Na}^+$  translocation via such a channel would be expected to be electrogenic, and thus impact upon  $V_m$  as well as  $\text{Na}^+$  handling (Katritch *et al.*, 2014; Shalaeva *et al.*, 2019). This has important implications for cancer cells exhibiting altered  $\text{Na}^+$  dynamics, since  $V_m$  is an important regulator of cancer cell behaviour (Yang & Brackenbury, 2022); moreover, the altered  $[\text{Na}^+]_i$  observed in breast tumours relative to healthy tissue (James *et al.*, 2022) might be expected to disrupt GPCR regulation by  $\text{Na}^+$ .

These findings also present a cautionary tale for cell physiologists using the methods employed in this study for exploring the relationship between  $\text{Na}^+$  conductance,  $\text{Ca}^{2+}$  signalling and wider cell behaviour. Application of  $0\text{Na}^+/\text{NMDG}$  or  $0\text{Na}^+/\text{ChoCl}$  is widely utilised for isolating cell responses from the influence of extracellular  $\text{Na}^+$ ; however, these manoeuvres are not inert (Thuma & Hooper, 2018). In addition to assessing for reverse mode NCX activity (Chovancova *et al.*, 2020),  $\text{Na}^+$  regulation of GPCRs (and resultant effects on  $\text{Ca}^{2+}$  dynamics) should be taken into careful consideration and controlled for when using  $0\text{Na}^+/\text{NMDG}$ ,  $0\text{Na}^+/\text{ChoCl}$  or similar manoeuvres to probe  $\text{Na}^+$  conductance mechanisms.

Beyond the present study, very little is known about the link between  $\text{Ca}^{2+}$  signalling and  $\text{Na}^+$  homeostasis in the context of breast cancer. Evidence indicates that  $\text{Ca}^{2+}$  oscillations in MDA-MB-231 cells are regulated by aberrantly expressed VGSCs (Rizaner *et al.*, 2016). Moreover, elevations in extracellular  $\text{Na}^+$  cause p-glycoprotein-induced resistance to paclitaxel in breast cancer cells via  $\text{Ca}^{2+}$  signalling (Babaer *et al.*, 2018). Of particular relevance to the current study (where  $\text{Na}^+$  depletion activated  $\text{IP}_3\text{R}$ -dependent  $\text{Ca}^{2+}$  signalling),  $\text{IP}_3\text{Rs}$  are upregulated in breast cancer (Foulon *et al.*, 2022), and estradiol-induced  $\text{IP}_3\text{R}$  signalling regulates breast cancer cell proliferation (Szatkowski *et al.*, 2010). Either pharmacological inhibition or knockdown of  $\text{IP}_3\text{Rs}$  in breast cancer cells led to dysregulated bioenergetics, and autophagy, cell cycle arrest and cell death (Mound *et al.*, 2013; Singh *et al.*, 2017). Thus, the emerging evidence for altered  $\text{Na}^+$  and  $\text{Ca}^{2+}$  handling and their inextricable link via common channels and transporters hint at a hitherto relatively underexplored avenue in the context of cancer. The present study provides further evidence of such a link between  $\text{Ca}^{2+}$  and  $\text{Na}^+$  signalling that may be important implications for regulating cancer cell behaviour and future therapy.

## **Author contributions**

The project was designed by WJB and ADJ; experiments were carried out by ADJ, KU, IJ and RS with the assistance of GJOE; data analysis was performed by ADJ, KU, IJ and RS; the manuscript was prepared by ADJ and WJB; ADJ, WJB, GJOE and SC contributed to study design, interpretation of the data and critical revision of the paper for important intellectual content.

## **Acknowledgements**

This work was supported by Cancer Research UK (A25922) and an EPSRC Impact Accelerator Award.

## **Disclosure statement**

The authors declare that they have no competing interests.

## **ORCID**

William J Brackenbury: <https://orcid.org/0000-0001-6882-3351>

Gareth J. O. Evans: <https://orcid.org/0000-0003-2573-7001>



## References

- Agasid MT, Sørensen L, Urner LH, Yan J & Robinson CV (2021). The Effects of Sodium Ions on Ligand Binding and Conformational States of G Protein-Coupled Receptors—Insights from Mass Spectrometry. *Journal of the American Chemical Society* **143**, 4085–4089. Available at: <http://dx.doi.org/10.1021/jacs.0c11837>.
- Babaer D, Amara S, Ivy M, Zhao Y, Lammers PE, Titze JM & Tiriveedhi V (2018). High salt induces P-glycoprotein mediated treatment resistance in breast cancer cells through store operated calcium influx. *Oncotarget* **9**, 25193–25205.
- Berridge MJ, Lipp P & Bootman MD (2000). The versatility and universality of calcium signalling. *Nat Rev Mol Cell Biol* **1**, 11–21.
- Bruce JIE (2018). Metabolic regulation of the PMCA: Role in cell death and survival. *Cell Calcium* **69**, 28–36.
- Bruce JIE & James AD (2020). Targeting the Calcium Signalling Machinery in Cancer. *Cancers* **12**, 2351. Available at: <http://dx.doi.org/10.3390/cancers12092351>.
- Cameron IL, Smith NK, Pool TB & Sparks RL (1980). Intracellular concentration of sodium and other elements as related to mitogenesis and oncogenesis in vivo. *Cancer Res* **40**, 1493–1500.
- Capatina AL, Lagos D & Brackenbury WJ (2022). Targeting Ion Channels for Cancer Treatment: Current Progress and Future Challenges. *Rev Physiol Biochem Pharmacol* **183**, 1–43.
- Chovancova B, Liskova V, Babula P & Krizanova O (2020). Role of Sodium/Calcium Exchangers in Tumors. *Biomolecules* **10**, 1257.
- Davis FM, Azimi I, Faville RA, Peters AA, Jalink K, Putney JW, Goodhill GJ, Thompson EW, Roberts-Thomson SJ & Monteith GR (2014). Induction of epithelial–mesenchymal transition (EMT) in breast cancer cells is calcium signal dependent. *Oncogene* **33**, 2307–2316. Available at: <http://dx.doi.org/10.1038/onc.2013.187>.
- Feng M, Grice DM, Faddy HM, Nguyen N, Leitch S, Wang Y, Muend S, Kenny PA, Sukumar S, Roberts-Thomson SJ, Monteith GR & Rao R (2010). Store-independent activation of Orai1 by SPCA2 in mammary tumors. *Cell* **143**, 84–98.
- Finch EA & Goldin SM (1994). Response : Calcium and Inositol 1,4,5-Trisphosphate-Induced Ca<sup>2+</sup> Release. *Science* **265**, 813–815. Available at: <http://dx.doi.org/10.1126/science.265.5173.813.b>.
- Foulon A, Rybarczyk P, Jonckheere N, Brabencova E, Sevestre H, Ouadid-Ahidouch H & Rodat-Despoix L (2022). Inositol (1,4,5)-Trisphosphate Receptors in Invasive Breast Cancer: A New Prognostic Tool? *Int J Mol Sci*; DOI: 10.3390/ijms23062962.
- Hanahan D & Weinberg RA (2016). The hallmarks of cancer. *Oxford Textbook of Oncology* 3–10. Available at: <http://dx.doi.org/10.1093/med/9780199656103.003.0001>.
- Hernansanz-Agustín P et al. (2020). Na controls hypoxic signalling by the mitochondrial respiratory chain. *Nature* **586**, 287–291.

- Hu X, Wang Y, Hunkele A, Provasi D, Pasternak GW & Filizola M (2019). Kinetic and thermodynamic insights into sodium ion translocation through the  $\mu$ -opioid receptor from molecular dynamics and machine learning analysis. *PLoS Comput Biol* **15**, e1006689.
- James AD, Chan A, Erice O, Siriwardena AK & Bruce JIE (2013). Glycolytic ATP fuels the plasma membrane calcium pump critical for pancreatic cancer cell survival. *J Biol Chem* **288**, 36007–36019.
- James AD, Leslie TK, Kaggie JD, Wiggins L, Patten L, Murphy O'Duinn J, Langer S, Labarthe M-C, Riemer F, Baxter G, McLean MA, Gilbert FJ, Kennerley AJ & Brackenbury WJ (2022). Sodium accumulation in breast cancer predicts malignancy and treatment response. *Br J Cancer*, DOI: 10.1038/s41416-022-01802-w.
- James AD, Patel W, Butt Z, Adiamah M, Dakhel R, Latif A, Uggenti C, Swanton E, Imamura H, Siriwardena AK & Bruce JIE (2015). The Plasma Membrane Calcium Pump in Pancreatic Cancer Cells Exhibiting the Warburg Effect Relies on Glycolytic ATP. *Journal of Biological Chemistry* **290**, 24760–24771. Available at: <http://dx.doi.org/10.1074/jbc.m115.668707>.
- Jeong J, VanHouten JN, Dann P, Kim W, Sullivan C, Yu H, Liotta L, Espina V, Stern DF, Friedman PA & Wysolmerski JJ (2016). PMCA2 regulates HER2 protein kinase localization and signaling and promotes HER2-mediated breast cancer. *Proc Natl Acad Sci U S A* **113**, E282–E290.
- Katritch V, Fenalti G, Abola EE, Roth BL, Cherezov V & Stevens RC (2014). Allosteric sodium in class A GPCR signaling. *Trends in Biochemical Sciences* **39**, 233–244. Available at: <http://dx.doi.org/10.1016/j.tibs.2014.03.002>.
- Leslie TK, James AD, Zaccagna F, Grist JT, Deen S, Kennerley A, Riemer F, Kaggie JD, Gallagher FA, Gilbert FJ & Brackenbury WJ (2019). Sodium homeostasis in the tumour microenvironment. *Biochim Biophys Acta Rev Cancer* **1872**, 188304.
- Middelbeek J, Kuipers AJ, Henneman L, Visser D, Eidhof I, van Horssen R, Wieringa B, Canisius SV, Zwart W, Wessels LF, Sweep FCGJ, Bult P, Span PN, van Leeuwen FN & Jalink K (2012). TRPM7 is required for breast tumor cell metastasis. *Cancer Res* **72**, 4250–4261.
- Mound A, Rodat-Despoix L, Bougarn S, Ouadid-Ahidouch H & Matifat F (2013). Molecular interaction and functional coupling between type 3 inositol 1,4,5-trisphosphate receptor and BKCa channel stimulate breast cancer cell proliferation. *Eur J Cancer* **49**, 3738–3751.
- Nelson M, Yang M, Dowle AA, Thomas JR & Brackenbury WJ (2015). The sodium channel-blocking antiepileptic drug phenytoin inhibits breast tumour growth and metastasis. *Mol Cancer* **14**, 13.
- Ouwerkerk R, Jacobs MA, Macura KJ, Wolff AC, Stearns V, Mezban SD, Khouri NF, Bluemke DA & Bottomley PA (2007). Elevated tissue sodium concentration in malignant breast lesions detected with non-invasive  $^{23}\text{Na}$  MRI. *Breast Cancer Res Treat* **106**, 151–160.
- Pappalardo LW, Samad OA, Black JA & Waxman SG (2014). Voltage-gated sodium channel  $\text{Na}_v1.5$  contributes to astrogliosis in an *in vitro* model of glial injury via reverse  $\text{Na}/\text{Ca}^2$  exchange. *Glia* **62**, 1162–1175. Available at: <http://dx.doi.org/10.1002/glia.22671>.

- Patterson RL, van Rossum DB, Nikolaidis N, Gill DL & Snyder SH (2005). Phospholipase C- $\gamma$ : diverse roles in receptor-mediated calcium signaling. *Trends in Biochemical Sciences* **30**, 688–697. Available at: <http://dx.doi.org/10.1016/j.tibs.2005.10.005>.
- Rizaner N, Onkal R, Fraser SP, Pristerá A, Okuse K & Djamgoz MBA (2016). Intracellular calcium oscillations in strongly metastatic human breast and prostate cancer cells: control by voltage-gated sodium channel activity. *Eur Biophys J* **45**, 735–748.
- Shalaeva DN, Cherepanov DA, Galperin MY, Vriend G & Mulkidjanian AY (2019). G protein-coupled receptors of class A harness the energy of membrane potential to increase their sensitivity and selectivity. *Biochimica et Biophysica Acta (BBA) - Biomembranes* **1861**, 183051. Available at: <http://dx.doi.org/10.1016/j.bbamem.2019.183051>.
- Singh A, Chagtoo M, Tiwari S, George N, Chakravarti B, Khan S, Lakshmi S & Godbole MM (2017). Inhibition of Inositol 1, 4, 5-Trisphosphate Receptor Induce Breast Cancer Cell Death Through Deregulated Autophagy and Cellular Bioenergetics. *J Cell Biochem* **118**, 2333–2346.
- Szatkowski C, Parys JB, Ouadid-Ahidouch H & Matifat F (2010). Inositol 1,4,5-trisphosphate-induced Ca<sup>2+</sup> signalling is involved in estradiol-induced breast cancer epithelial cell growth. *Molecular Cancer*, DOI: 10.1186/1476-4598-9-156. Available at: <http://dx.doi.org/10.1186/1476-4598-9-156>.
- Thuma JB & Hooper SL (2018). Choline and NMDG directly reduce outward currents: reduced outward current when these substances replace Na is alone not evidence of Na-activated K currents. *Journal of Neurophysiology* **120**, 3217–3233. Available at: <http://dx.doi.org/10.1152/jn.00871.2017>.
- Uphoff CC, Gignac SM & Drexler HG (1992). Mycoplasma contamination in human leukemia cell lines. I. Comparison of various detection methods. *J Immunol Methods* **149**, 43–53.
- VanHouten J, Sullivan C, Bazinet C, Ryoo T, Camp R, Rimm DL, Chung G & Wysolmerski J (2010). PMCA2 regulates apoptosis during mammary gland involution and predicts outcome in breast cancer. *Proc Natl Acad Sci U S A* **107**, 11405–11410.
- Verkhatsky A, Trebak M, Perocchi F, Khananshili D & Sekler I (2018). Crosslink between calcium and sodium signalling. *Exp Physiol* **103**, 157–169.
- Vickery ON, Carvalheda CA, Zaidi SA, Pislakov AV, Katritch V & Zachariae U (2018). Intracellular Transfer of Na in an Active-State G-Protein-Coupled Receptor. *Structure* **26**, 171–180.e2. Available at: <http://dx.doi.org/10.1016/j.str.2017.11.013>.
- White KL, Eddy MT, Gao Z-G, Han GW, Lian T, Deary A, Patel N, Jacobson KA, Katritch V & Stevens RC (2018). Structural Connection between Activation Microswitch and Allosteric Sodium Site in GPCR Signaling. *Structure* **26**, 259–269.e5.
- Yang M & Brackenbury WJ (2022). Harnessing the Membrane Potential to Combat Cancer Progression. *Bioelectricity*, DOI: 10.1089/bioe.2022.0001. Available at: <http://dx.doi.org/10.1089/bioe.2022.0001>.
- Yang M, James AD, Suman R, Kasproicz R, Nelson M, O'Toole PJ & Brackenbury WJ (2020). Voltage-dependent activation of Rac1 by Na<sup>+</sup> 1.5 channels promotes cell migration. *J Cell Physiol* **235**, 3950–3972.
- Yuan S, Filipek S, Palczewski K & Vogel H (2014). Activation of G-protein-coupled receptors

correlates with the formation of a continuous internal water pathway. *Nature Communications*; DOI: 10.1038/ncomms5733. Available at: <http://dx.doi.org/10.1038/ncomms5733>.

Yuan S, Hu Z, Filipek S & Vogel H (2015). W246(6.48) opens a gate for a continuous intrinsic water pathway during activation of the adenosine A2A receptor. *Angew Chem Int Ed Engl* **54**, 556–559.

Yuan S, Vogel H & Filipek S (2013). The role of water and sodium ions in the activation of the  $\mu$ -opioid receptor. *Angew Chem Int Ed Engl* **52**, 10112–10115.

Yule DI & Williams JA (1992). U73122 inhibits Ca<sup>2+</sup> oscillations in response to cholecystokinin and carbachol but not to JMV-180 in rat pancreatic acinar cells. *J Biol Chem* **267**, 13830–13835.

Zarzycka B, Zaidi SA, Roth BL & Katritch V (2019). Harnessing Ion-Binding Sites for GPCR Pharmacology. *Pharmacol Rev* **71**, 571–595.

## Figure Legends

**Figure 1. Na<sup>+</sup>-free conditions deplete [Na<sup>+</sup>]<sub>i</sub> and induce elevated [Ca<sup>2+</sup>]<sub>i</sub> in breast cancer cells.** Fura-2 AM (4 μM) or SBFI AM (4 μM) fluorescence microscopy was used to measure [Ca<sup>2+</sup>]<sub>i</sub> and [Na<sup>+</sup>]<sub>i</sub> in cultured human breast cancer cells. Following perfusion with HEPES-PSS, MDA-MB-231 cells were perfused with Na<sup>+</sup>-free HEPES PSS; extracellular Na<sup>+</sup> was replaced with equimolar N-methyl-D-glucamine (0Na<sup>+</sup>/NMDG) or choline chloride (0Na<sup>+</sup>/ChoCl) to maintain osmotic balance. Representative traces show the effects of 0Na<sup>+</sup>/NMDG and 0Na<sup>+</sup>/ChoCl on [Ca<sup>2+</sup>]<sub>i</sub> (**Ai** and **Bi**, respectively) and [Na<sup>+</sup>]<sub>i</sub> (**Aii** and **Bii**, respectively) in MDA-MB-231 cells. Additional experiments were performed in MCF-7 (**C**) and SKBR3 (**D**) cells. Ionomycin (3 μM) was used to elicit a [Ca<sup>+</sup>]<sub>i</sub> increase as a positive control.

**Figure 2. [Ca<sup>2+</sup>]<sub>i</sub> transients induced by removal of extracellular Na<sup>+</sup> in breast cancer cells are not due to Ca<sup>2+</sup> entry.** MDA-MB-231 cells were loaded with fura-2 AM (4 μM) and perfused with HEPES-PSS. Extracellular Na<sup>+</sup> was replaced with equimolar 0Na<sup>+</sup>/NMDG to maintain osmotic balance (**A**). To block all Ca<sup>2+</sup> entry from the extracellular space, cells were pretreated with five minutes of perfusion with Ca<sup>2+</sup>-free HEPES containing La<sup>3+</sup> (1 mM, **B**). Ionomycin (3 μM) was applied at the end of an experiment to elicit a [Ca<sup>+</sup>]<sub>i</sub> increase as a positive control. The maximum change in fluorescence ratio ( $\Delta R_{\max}$ , **C**) and area under the curve (AUC, **D**) were compared using a nested t-test for side-by-side comparisons; n = 4 independent experiments for each condition, ns, not significant compared with control. Data presented are nested values for individual cells grouped by experiment (grey dots) and experimental means  $\pm$  SEM (black line and bars).

**Figure 3. Hyperpolarisation of the membrane potential (V<sub>m</sub>) plays no role in [Ca<sup>2+</sup>]<sub>i</sub> transients in breast cancer cells induced by removal of extracellular Na<sup>+</sup>.** MDA-MB-231

cells were loaded with fura-2 AM (4  $\mu$ M) and perfused with HEPES-PSS in the presence of the large-conductance  $\text{Ca}^{2+}$ -activated  $\text{K}^+$  channel ( $\text{K}_{\text{Ca}1.1}$ ) activator NS-1619 to hyperpolarise  $V_m$ . Representative traces are shown for cells perfused without NS-1619 (**A**) and with 10  $\mu$ M NS-1619 (**B**) or 40  $\mu$ M NS-1619 (**C**). Application of  $\text{La}^{3+}$  (**D**) determined that  $[\text{Ca}^{2+}]_i$  changes observed following treatment with 40  $\mu$ M NS-1619 were due to  $\text{Ca}^{2+}$  entry. Ionomycin (3  $\mu$ M) was applied at the end of an experiment to elicit a  $[\text{Ca}^{2+}]_i$  increase as a positive control. The maximum change in fluorescence ratio ( $\Delta R_{\text{max}}$ , **C**) and area under the curve (AUC, **D**) were compared using a nested one-way ANOVA with post-hoc Tukey test for multiple comparisons;  $n = 3\text{--}4$  independent experiments for each condition. \*,  $p < 0.05$ ; \*\*,  $p < 0.01$  compared with control. Data presented are nested values for individual cells grouped by experiment (grey dots) and experimental means  $\pm$  SEM (black line and bars).

**Figure 4.  $[\text{Ca}^{2+}]_i$  transients induced by removal of extracellular  $\text{Na}^+$  in breast cancer cells require ER  $\text{Ca}^{2+}$  stores.** MDA-MB-231 cells were loaded with fura-2 AM (4  $\mu$ M) and  $\text{Ca}^{2+}$  imaging performed during replacement of extracellular  $\text{Na}^+$  with equimolar ( $0\text{Na}^+/\text{NMDG}$ ) in the presence or absence of the SERCA inhibitor cyclopiazonic acid (CPA, 30  $\mu$ M). Representative traces are shown for cells perfused without CPA (**A**) or where cells were pretreated for 20 minutes CPA prior to application of  $0\text{Na}^+/\text{NMDG}$  (**C**). The maximum change in fluorescence ratio ( $\Delta R_{\text{max}}$ , **C**) and area under the curve (AUC, **D**) were compared using a nested t-test for side-by-side comparisons;  $n = 4\text{--}6$  independent experiments for each condition; \*\*,  $p < 0.01$  compared with control. Data presented are nested values for individual cells grouped by experiment (grey circles) and experimental means  $\pm$  SEM (black line and bars)

**Figure 5.  $[\text{Ca}^{2+}]_i$  transients induced by removal of extracellular  $\text{Na}^+$  require activation of  $\text{IP}_3$  receptor and phospholipase C, but are independent of ryanodine receptor activation.** MDA-MB-231 cells were loaded with fura-2 AM (4  $\mu$ M) and  $\text{Ca}^{2+}$  imaging

performed during replacement of extracellular  $\text{Na}^+$  with equimolar ( $0\text{Na}^+/\text{NMDG}$ ) in the absence or presence of the  $\text{IP}_3$  receptor inhibitor 2-APB (50  $\mu\text{M}$ , **Ai** and **Aii**, respectively), the ryanodine receptor inhibitor dantrolene (10  $\mu\text{M}$ , **Bi** and **Bii**, respectively), and the phospholipase C inhibitor U73122 (2  $\mu\text{M}$ , **Ci** and **Cii**, respectively). For each condition, cells were pretreated with drug for 10 minutes prior to application of  $0\text{Na}^+/\text{NMDG}$ . Ionomycin (3  $\mu\text{M}$ ) was applied at the end of an experiment to elicit a  $[\text{Ca}^{2+}]_i$  increase as a positive control. The maximum change in fluorescence ratio ( $\Delta R_{\text{max}}$ ; **Aiii**, 2-APB; **Biii**, dantrolene; **Ciii**, U73122) and area under the curve (AUC; **Aiv**, 2-APB; **Biv**, dantrolene; **Civ**, U73122) were compared using a nested t-test for side-by-side comparisons;  $n = 3\text{--}5$  independent experiments for each condition; \*,  $p < 0.05$ ; \*\*\*,  $p < 0.001$  compared with control. Data presented are nested values for individual cells grouped by experiment (grey dots) and experimental means  $\pm$  SEM (black line and bars).

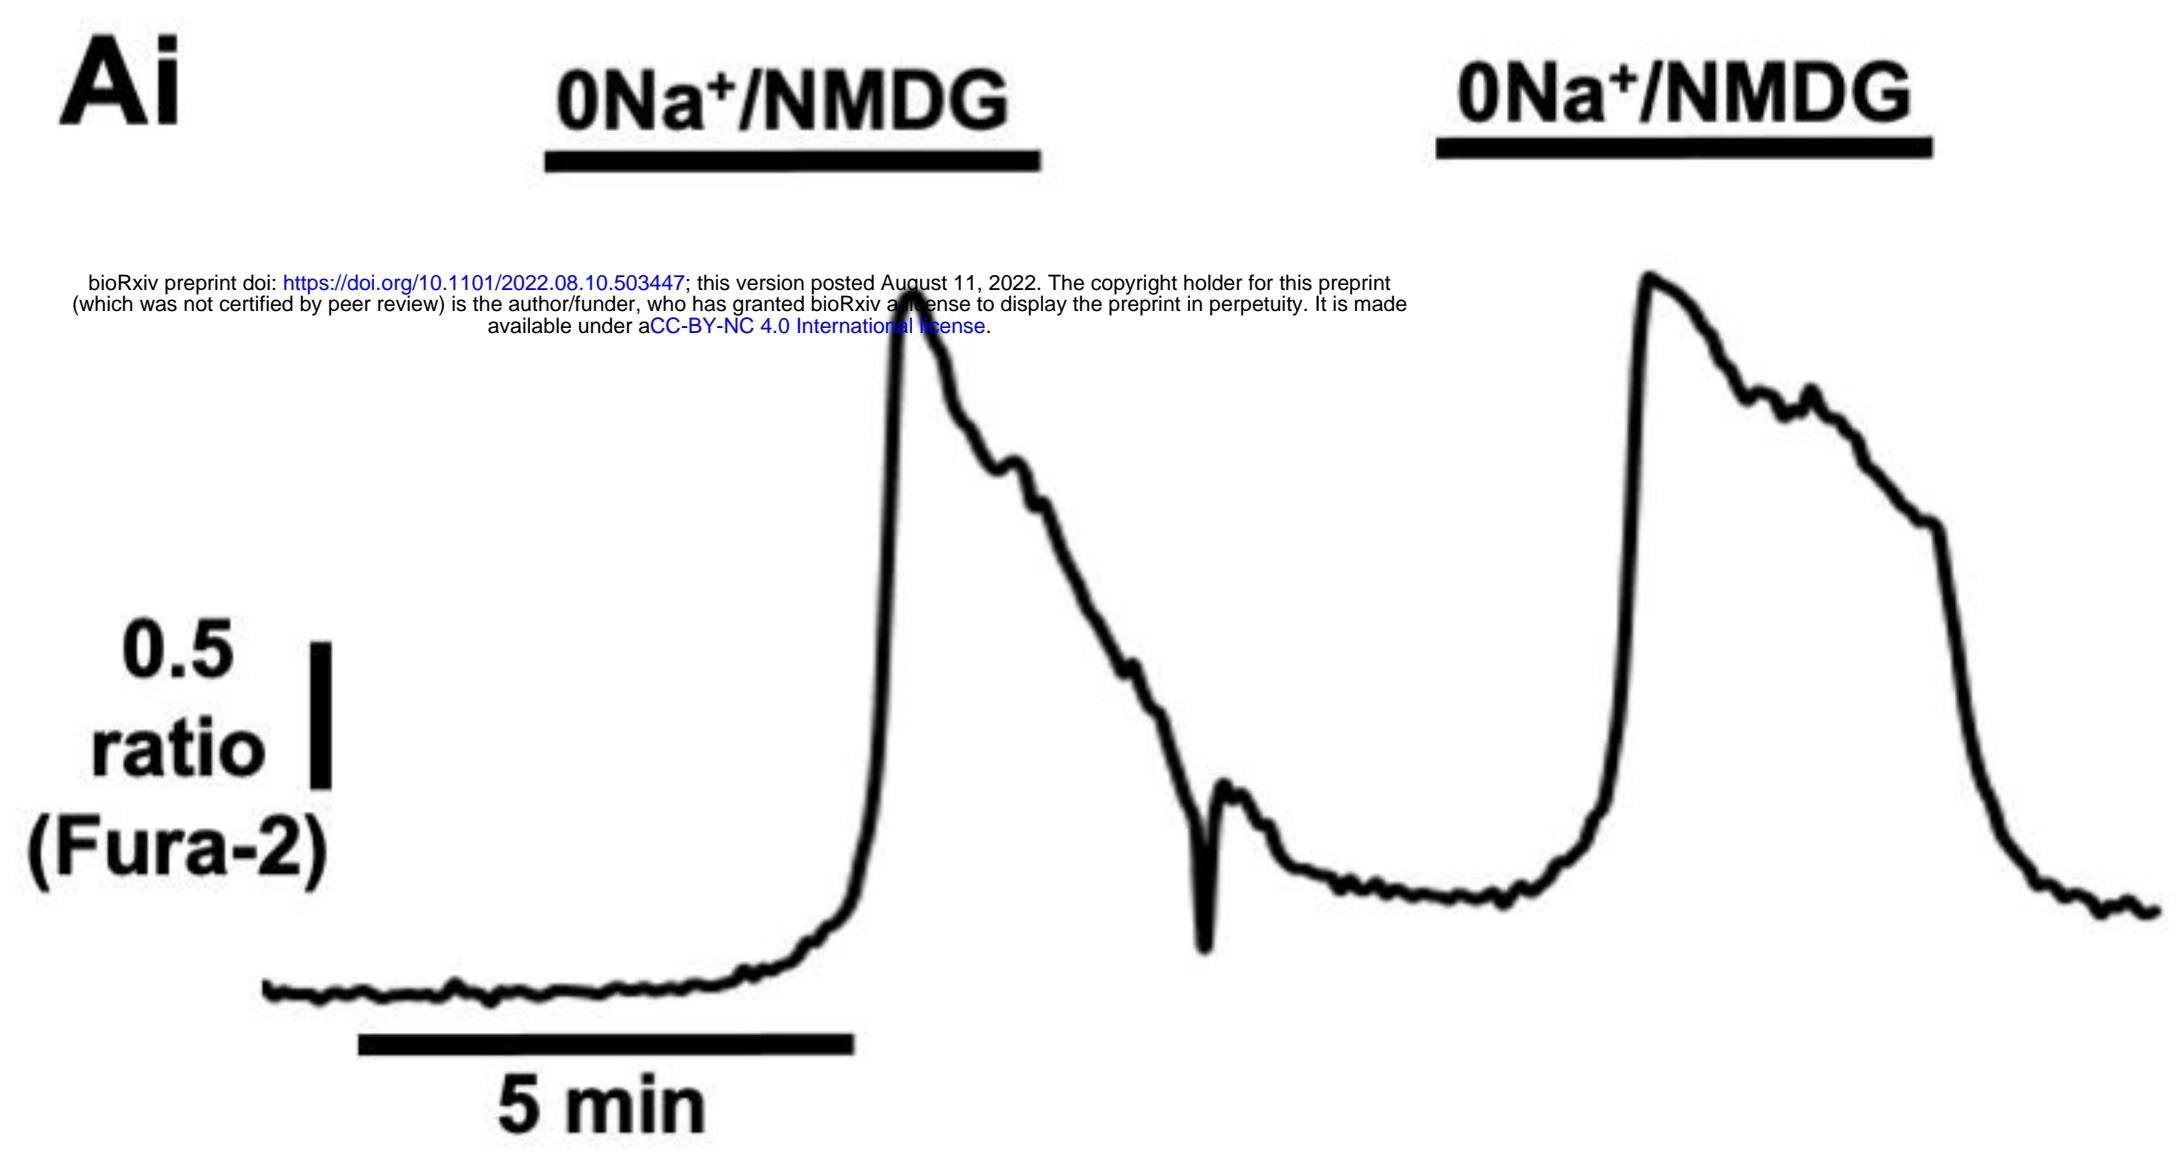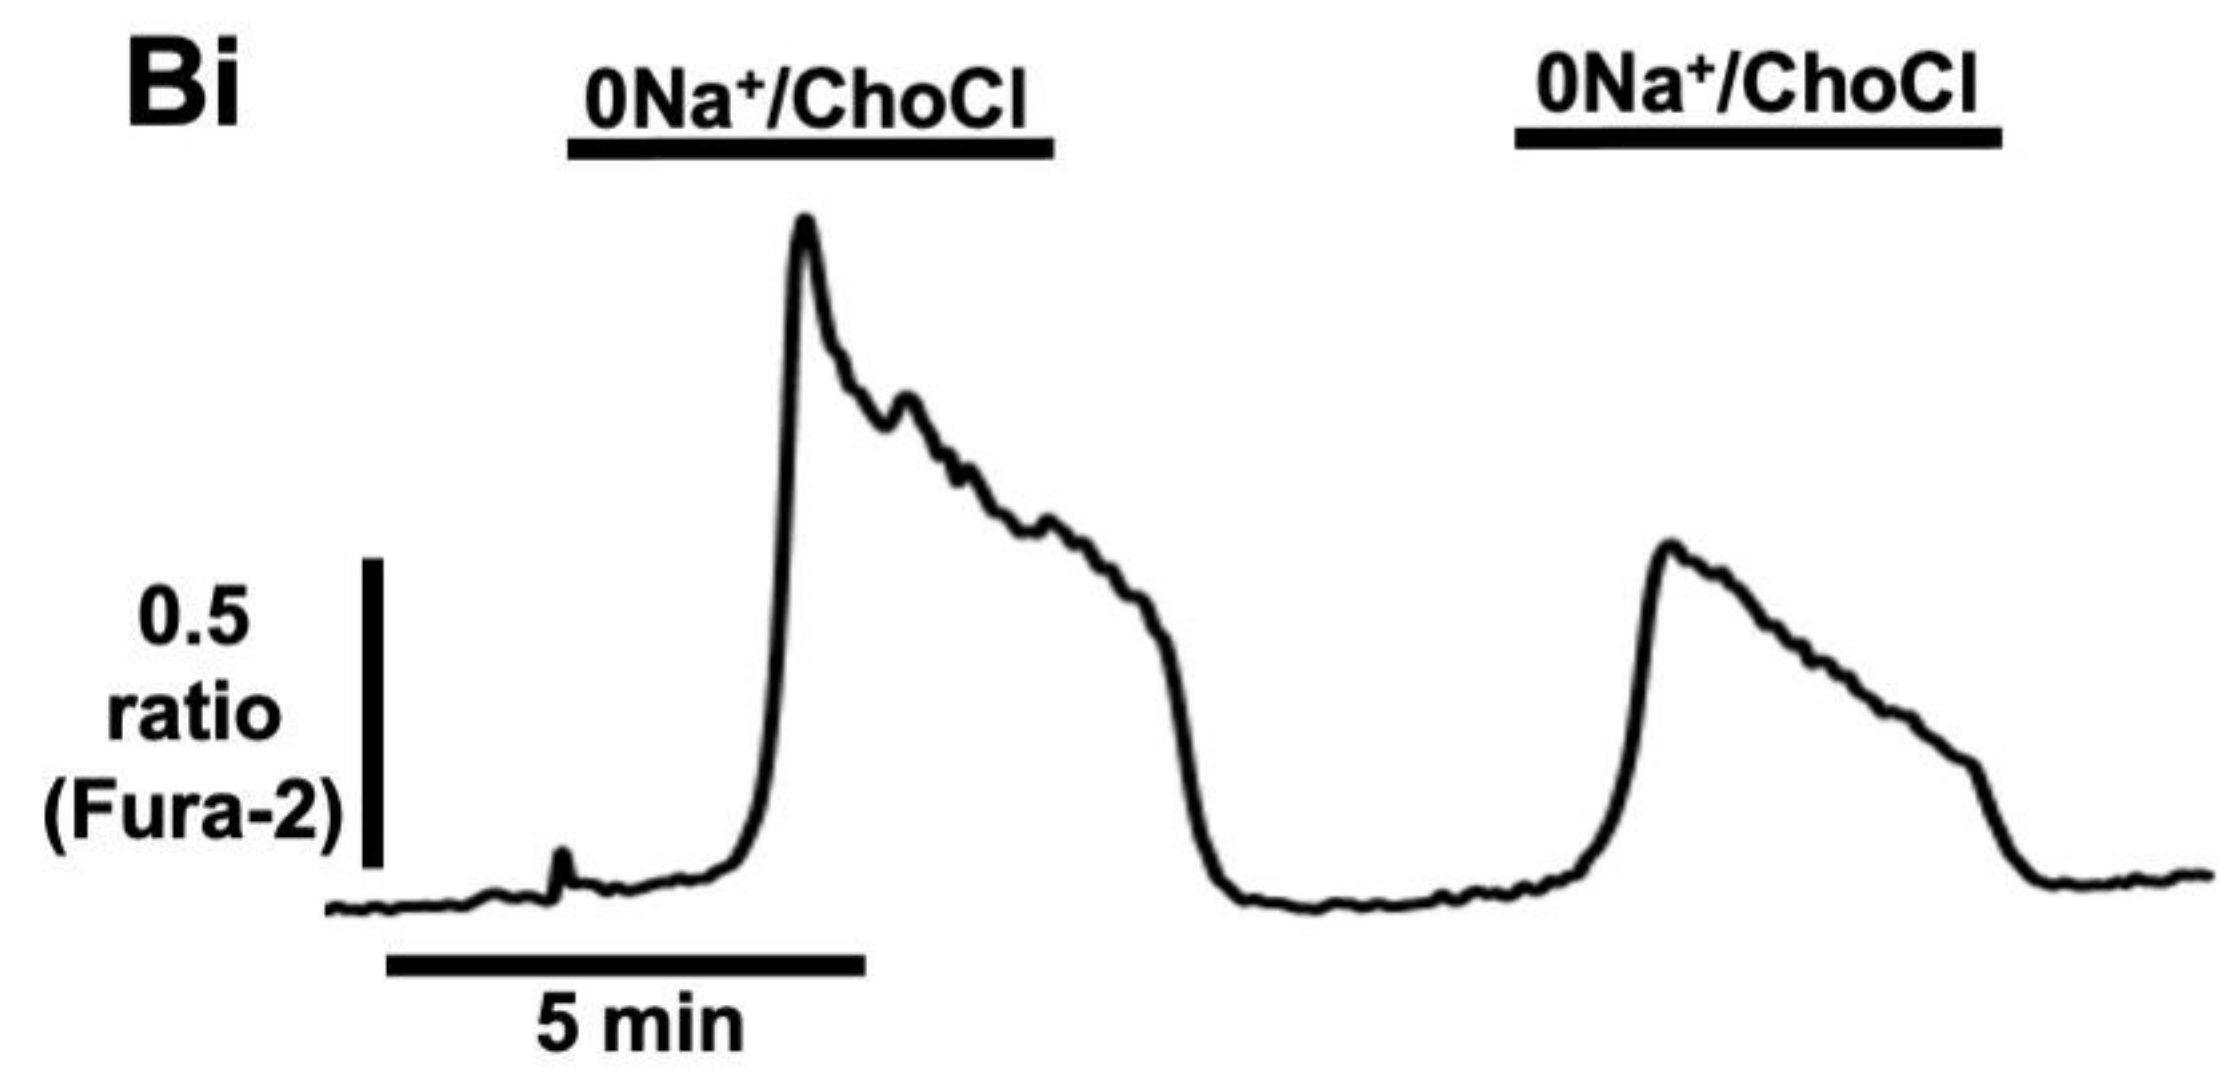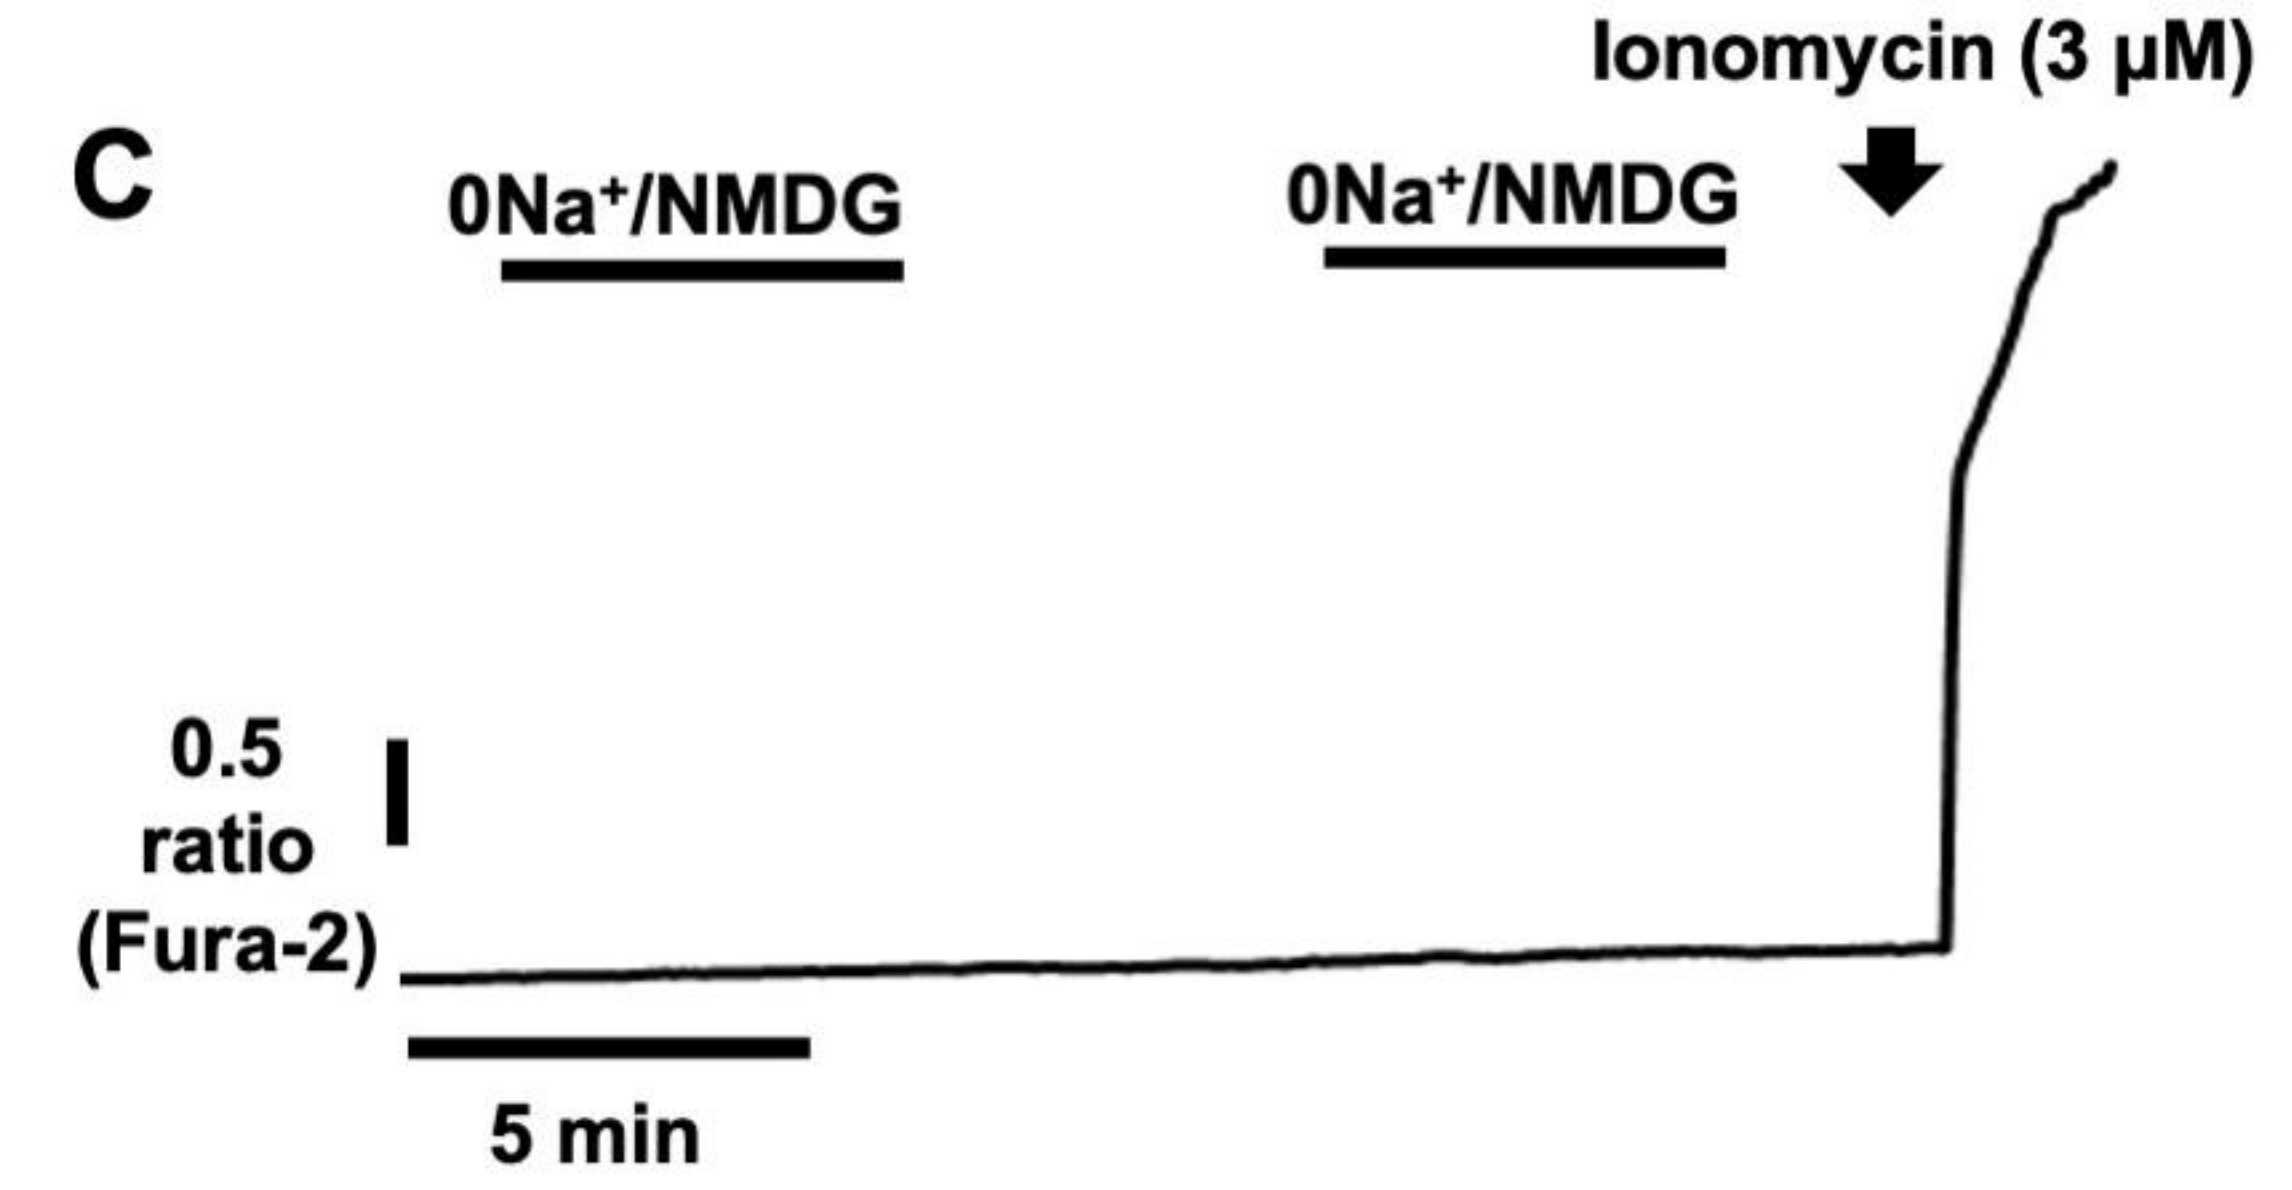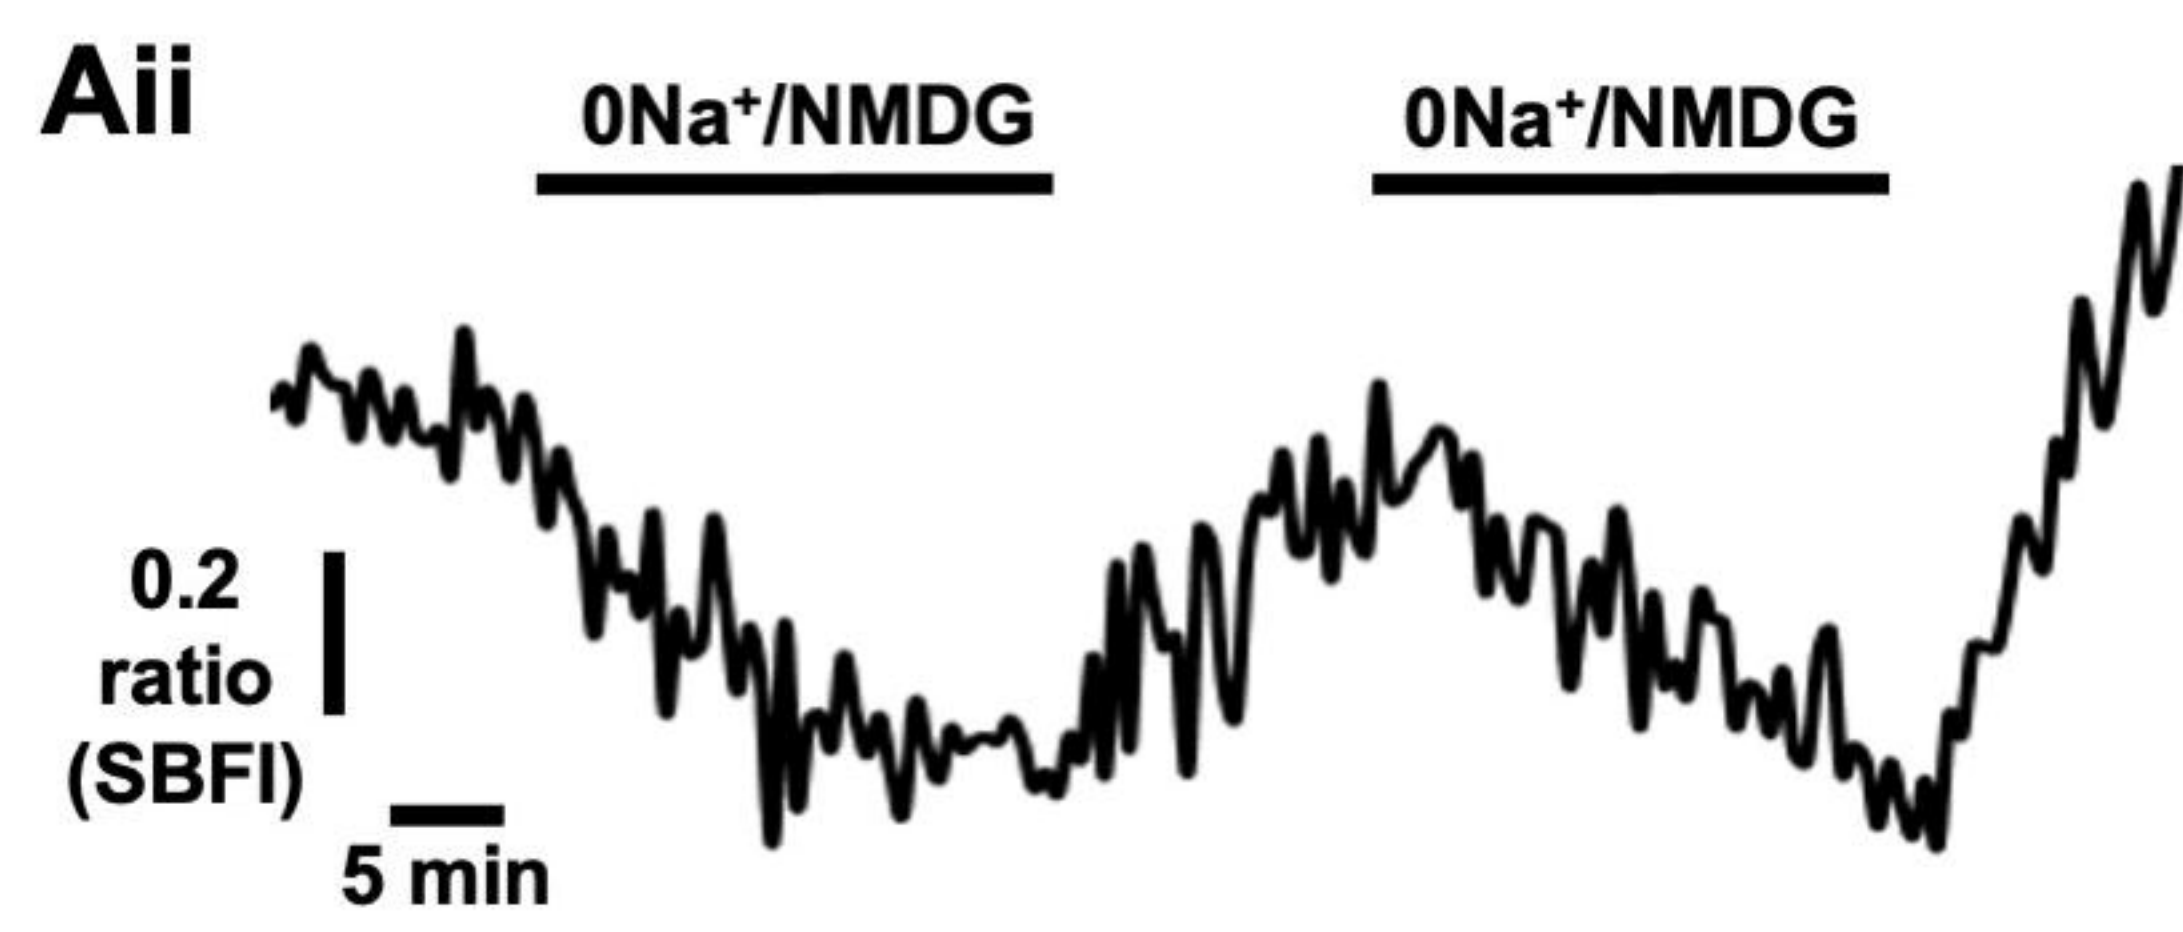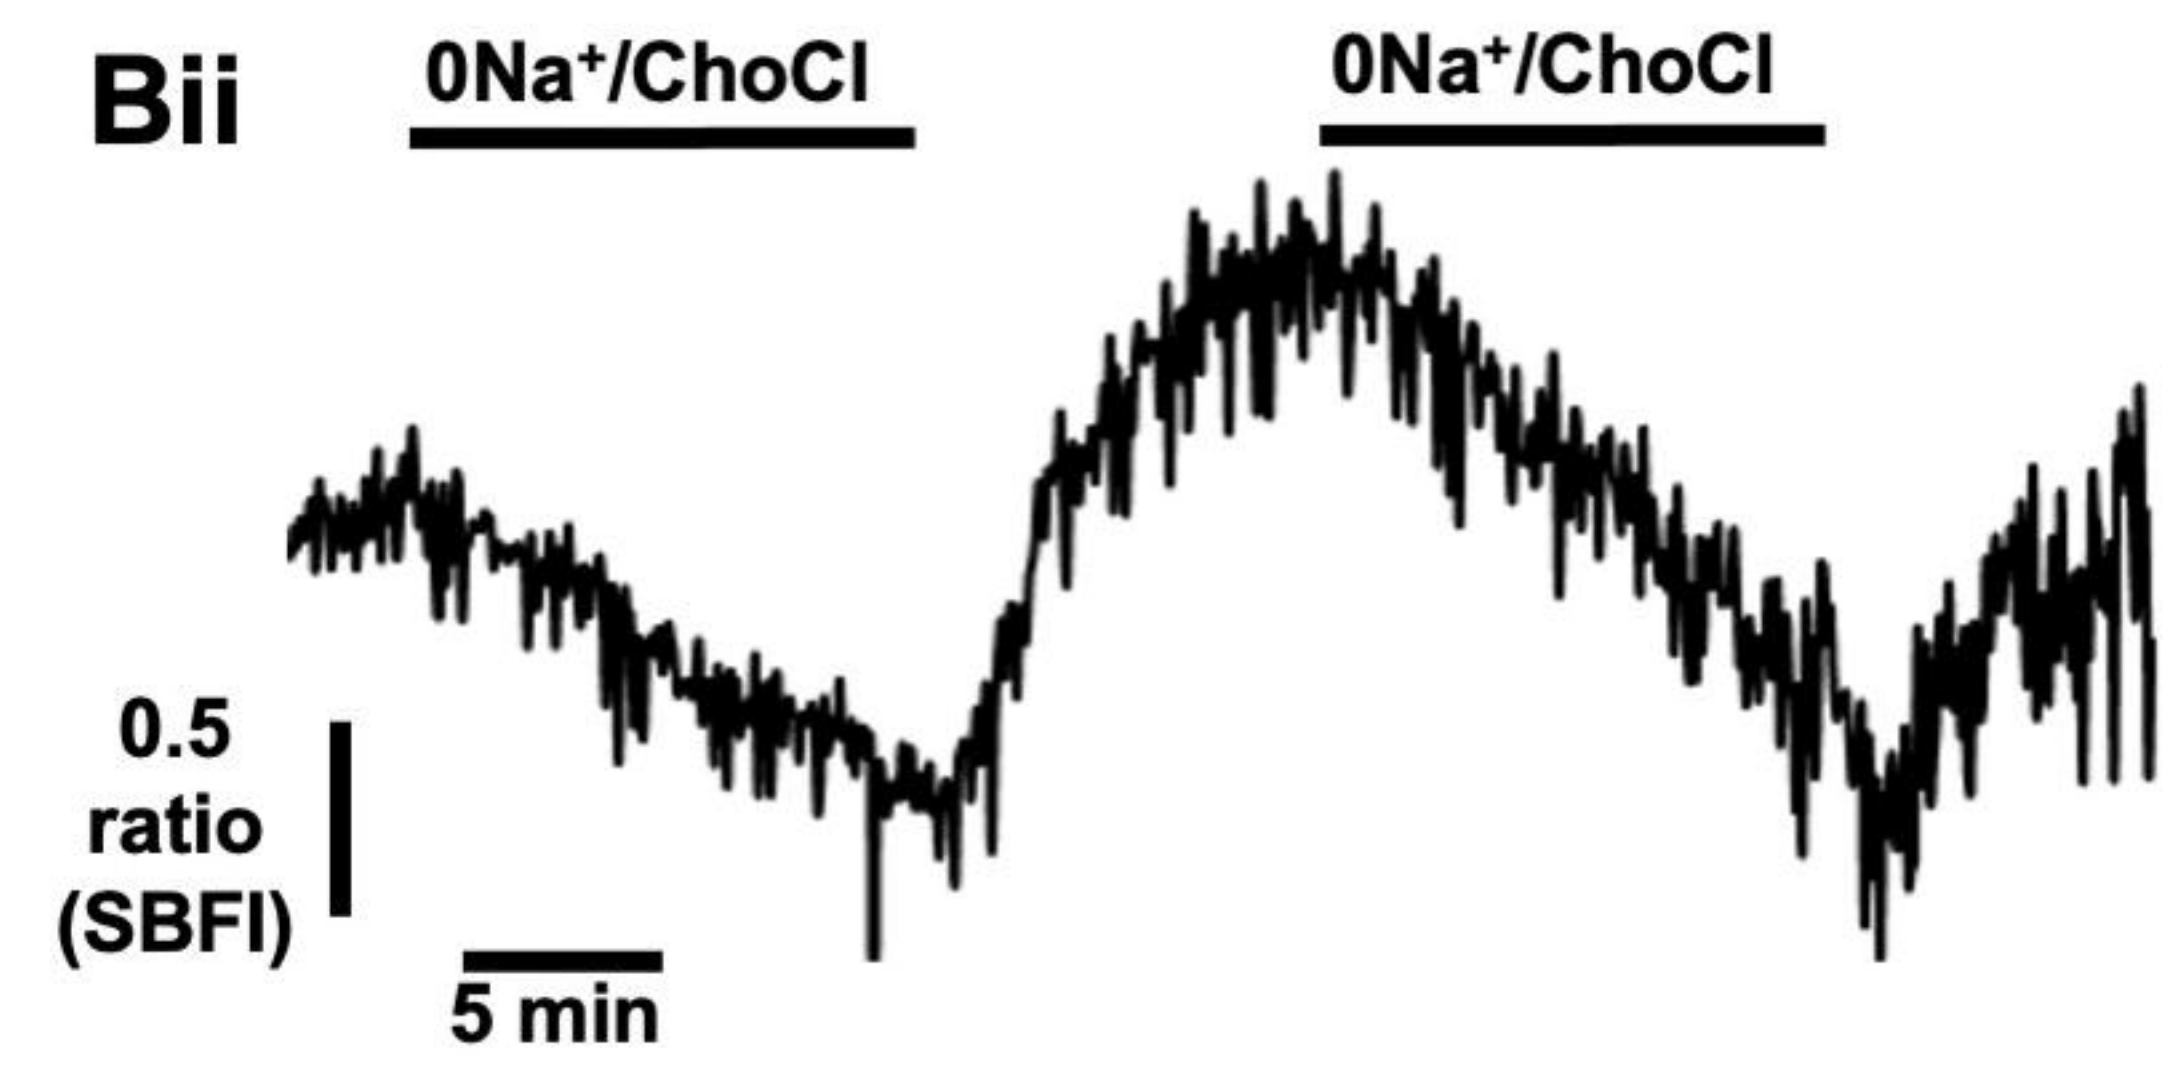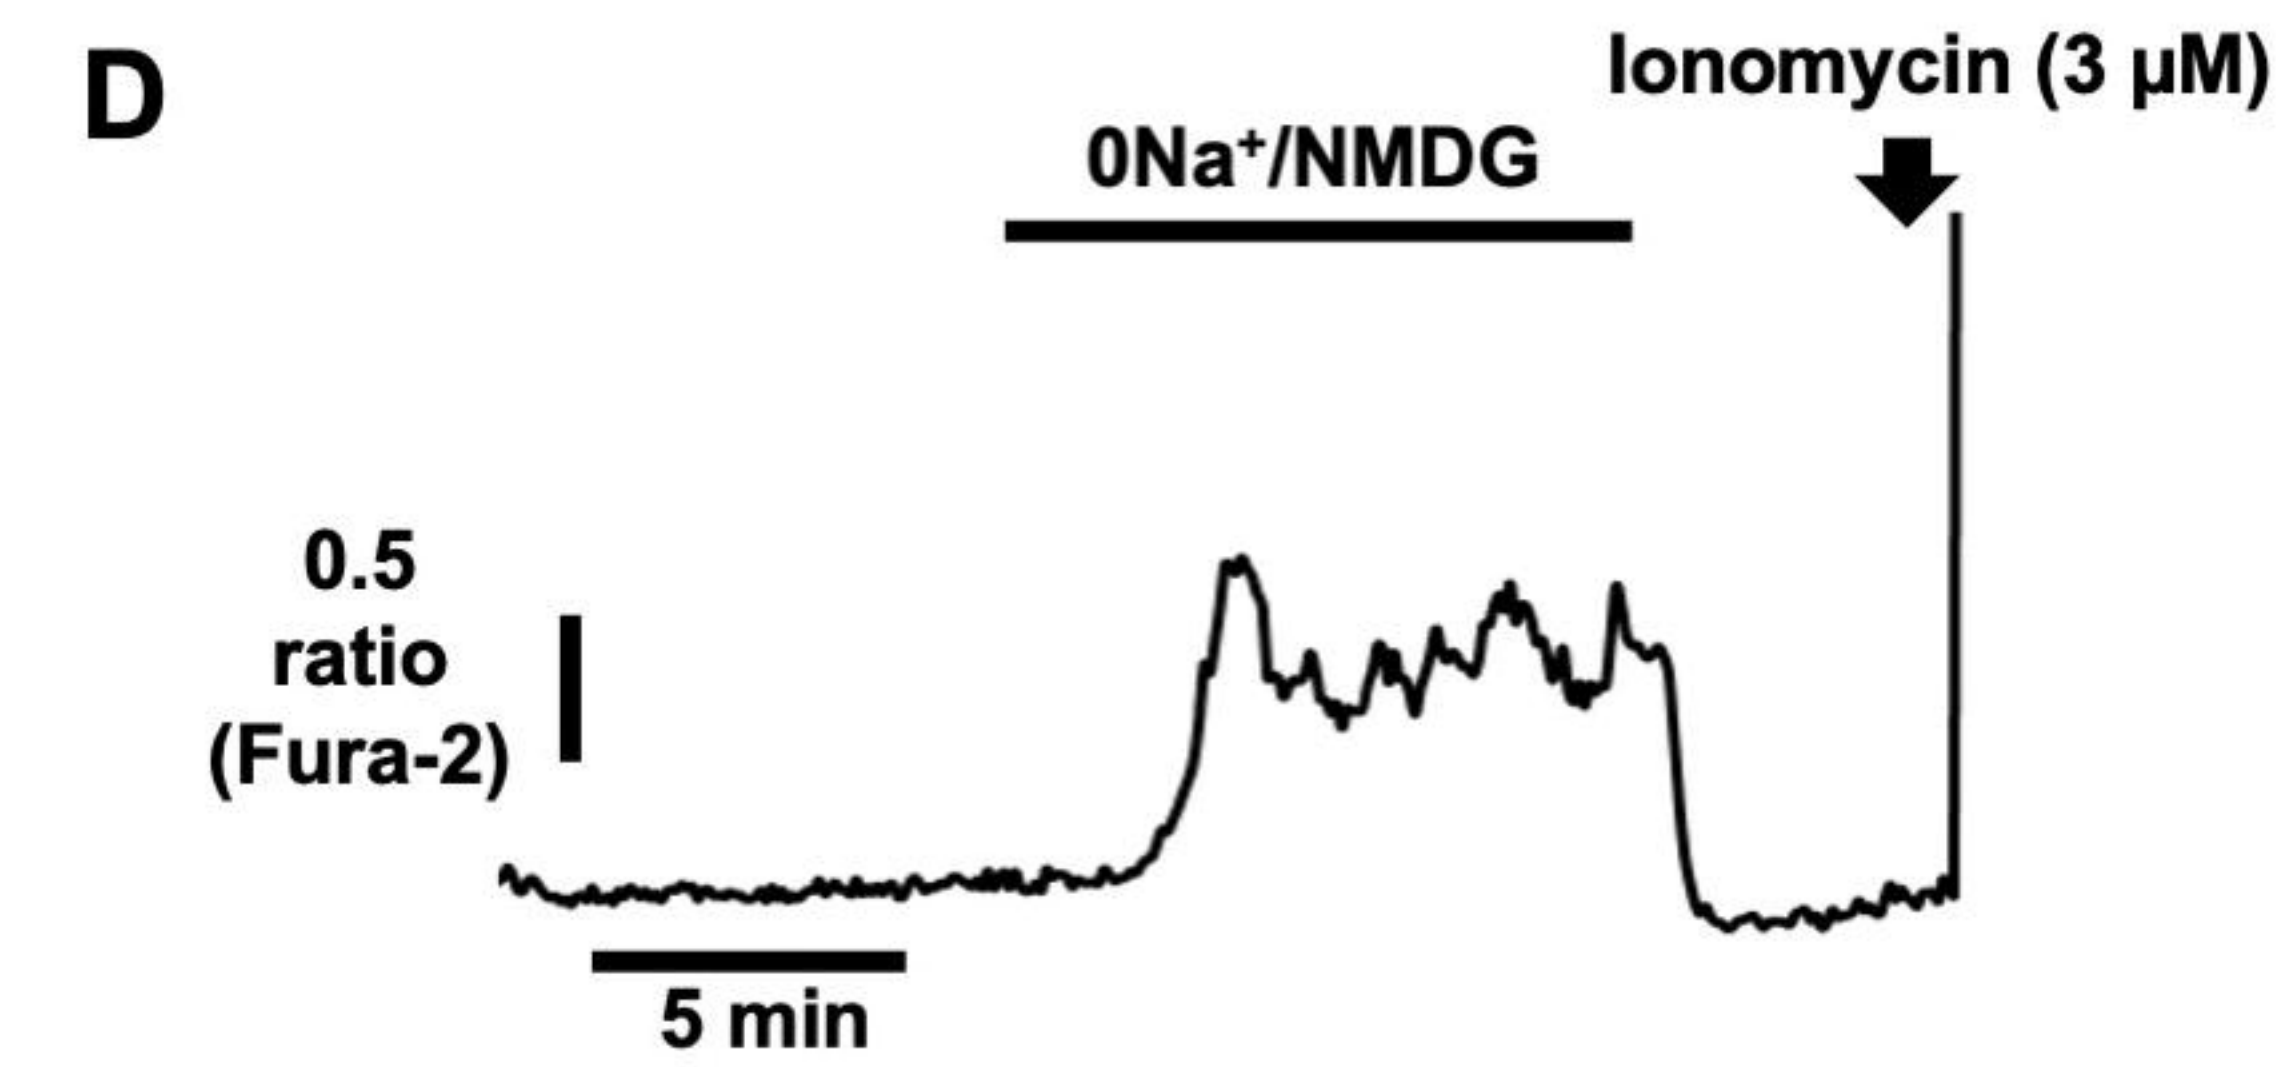



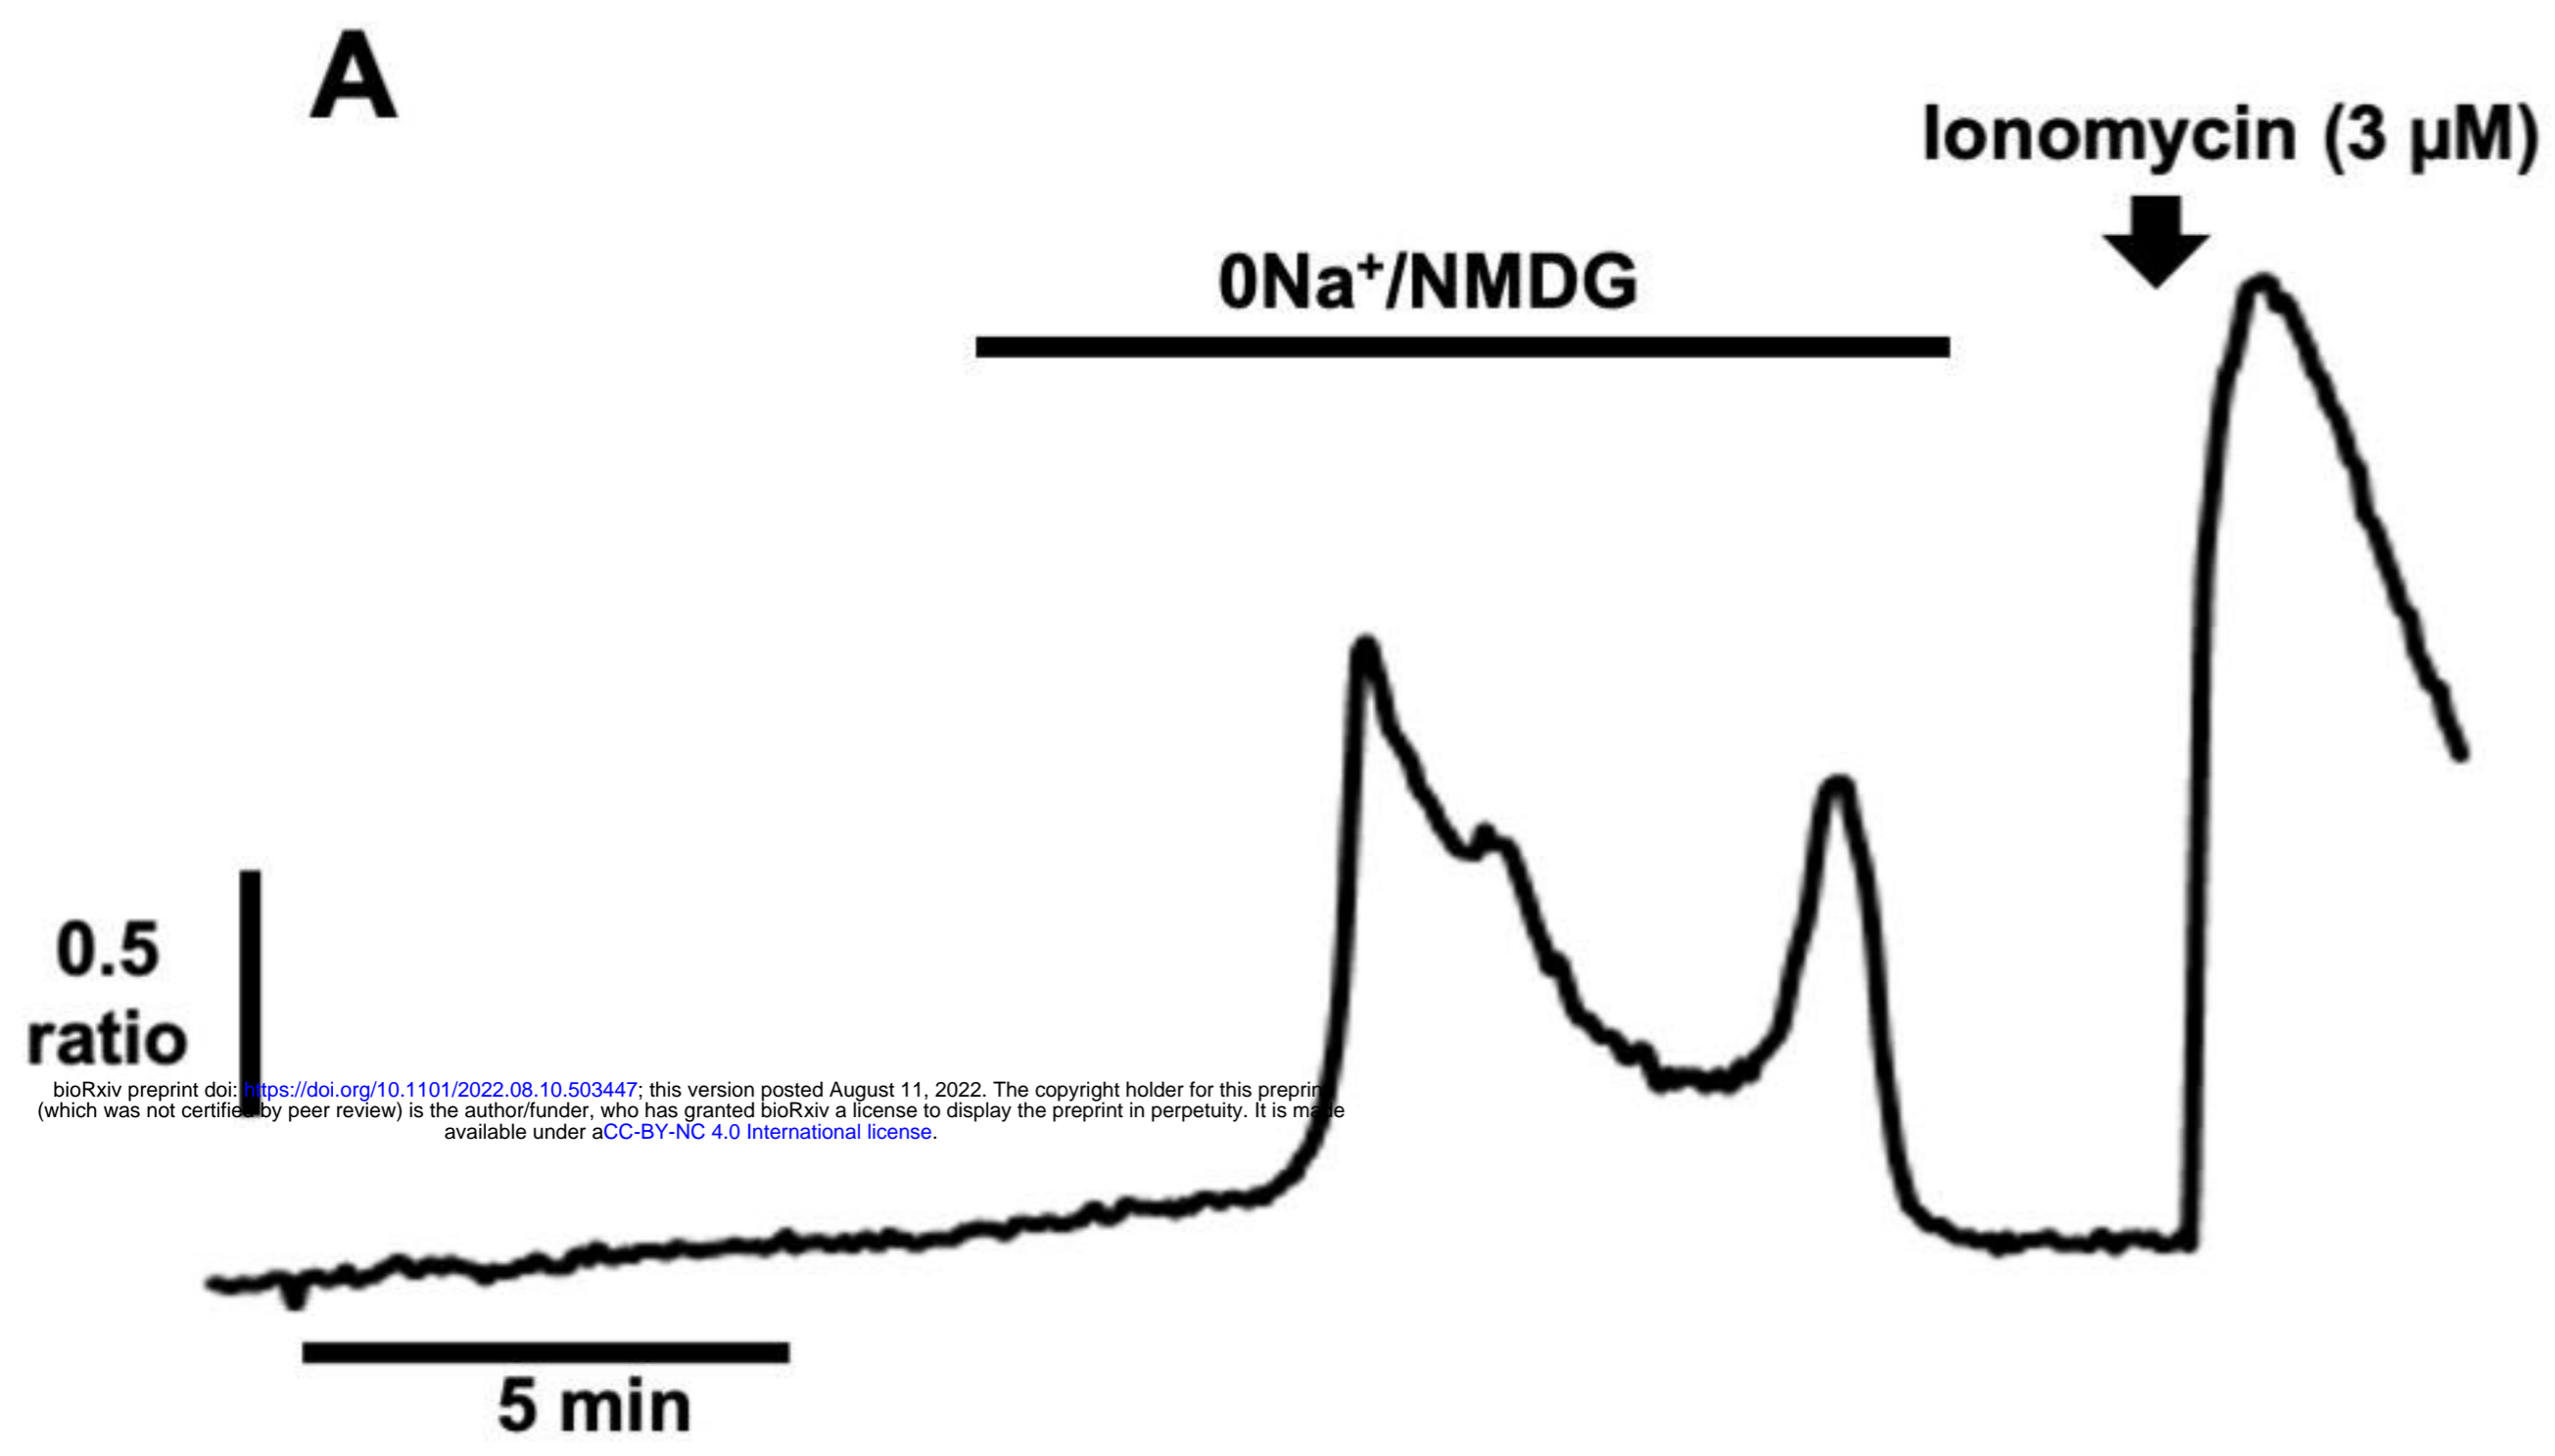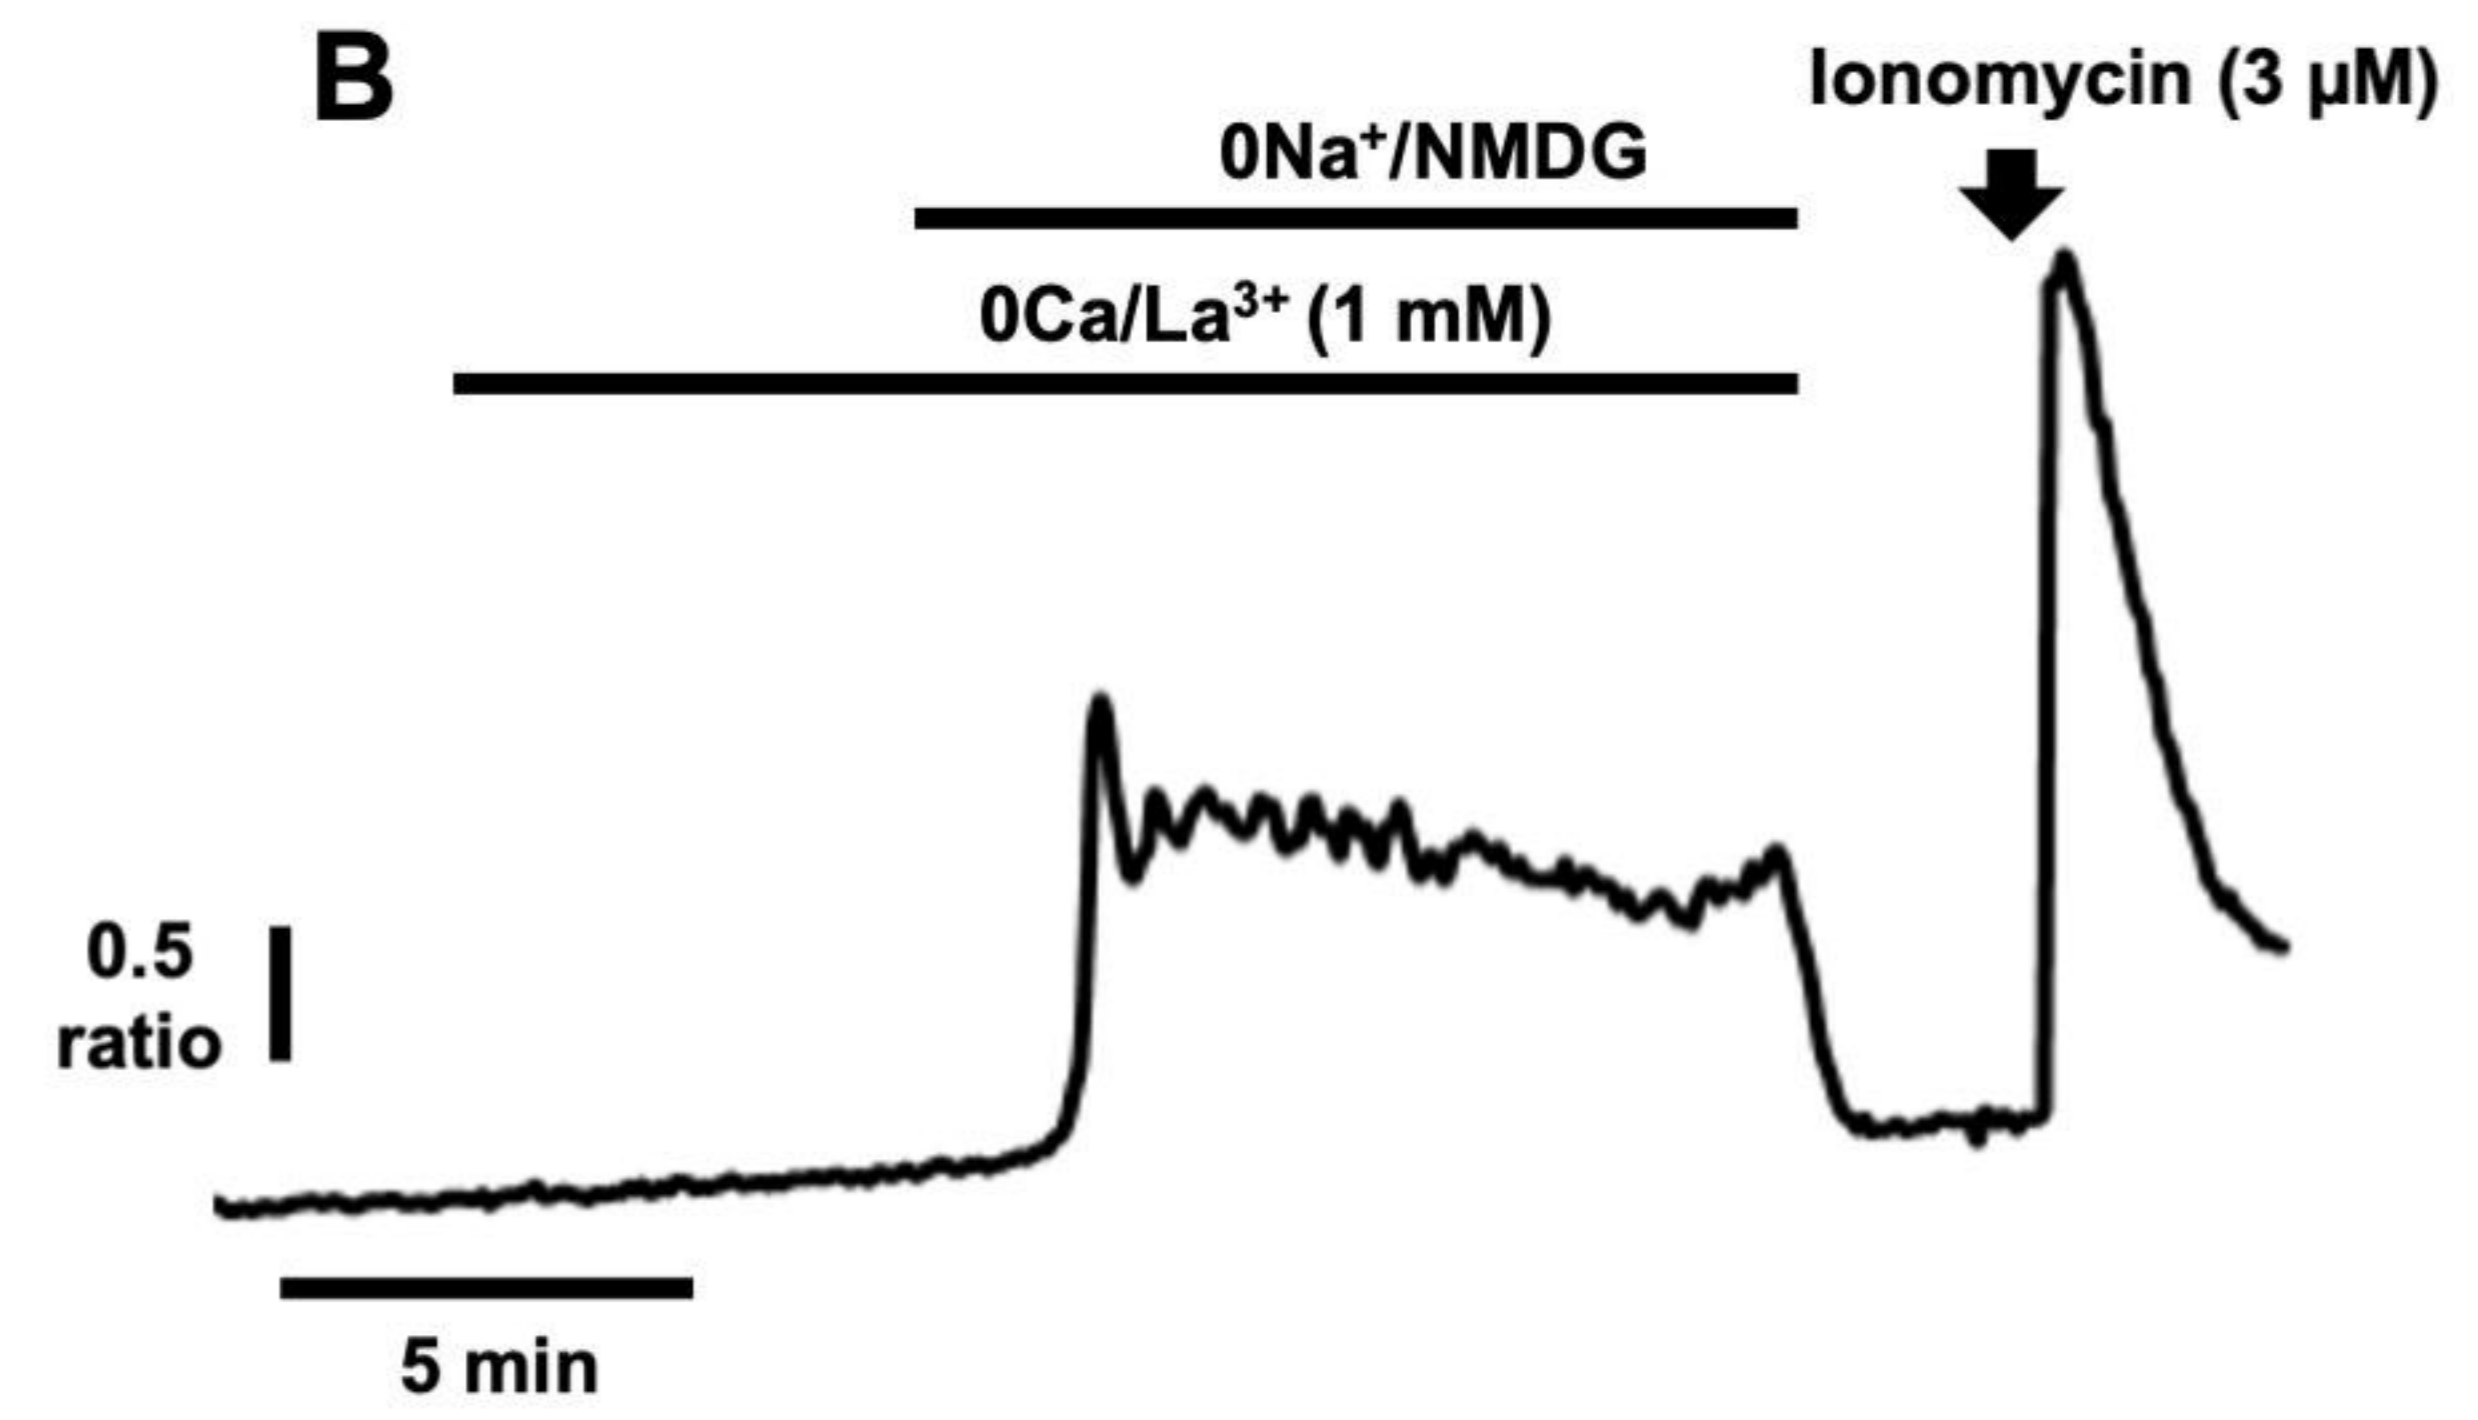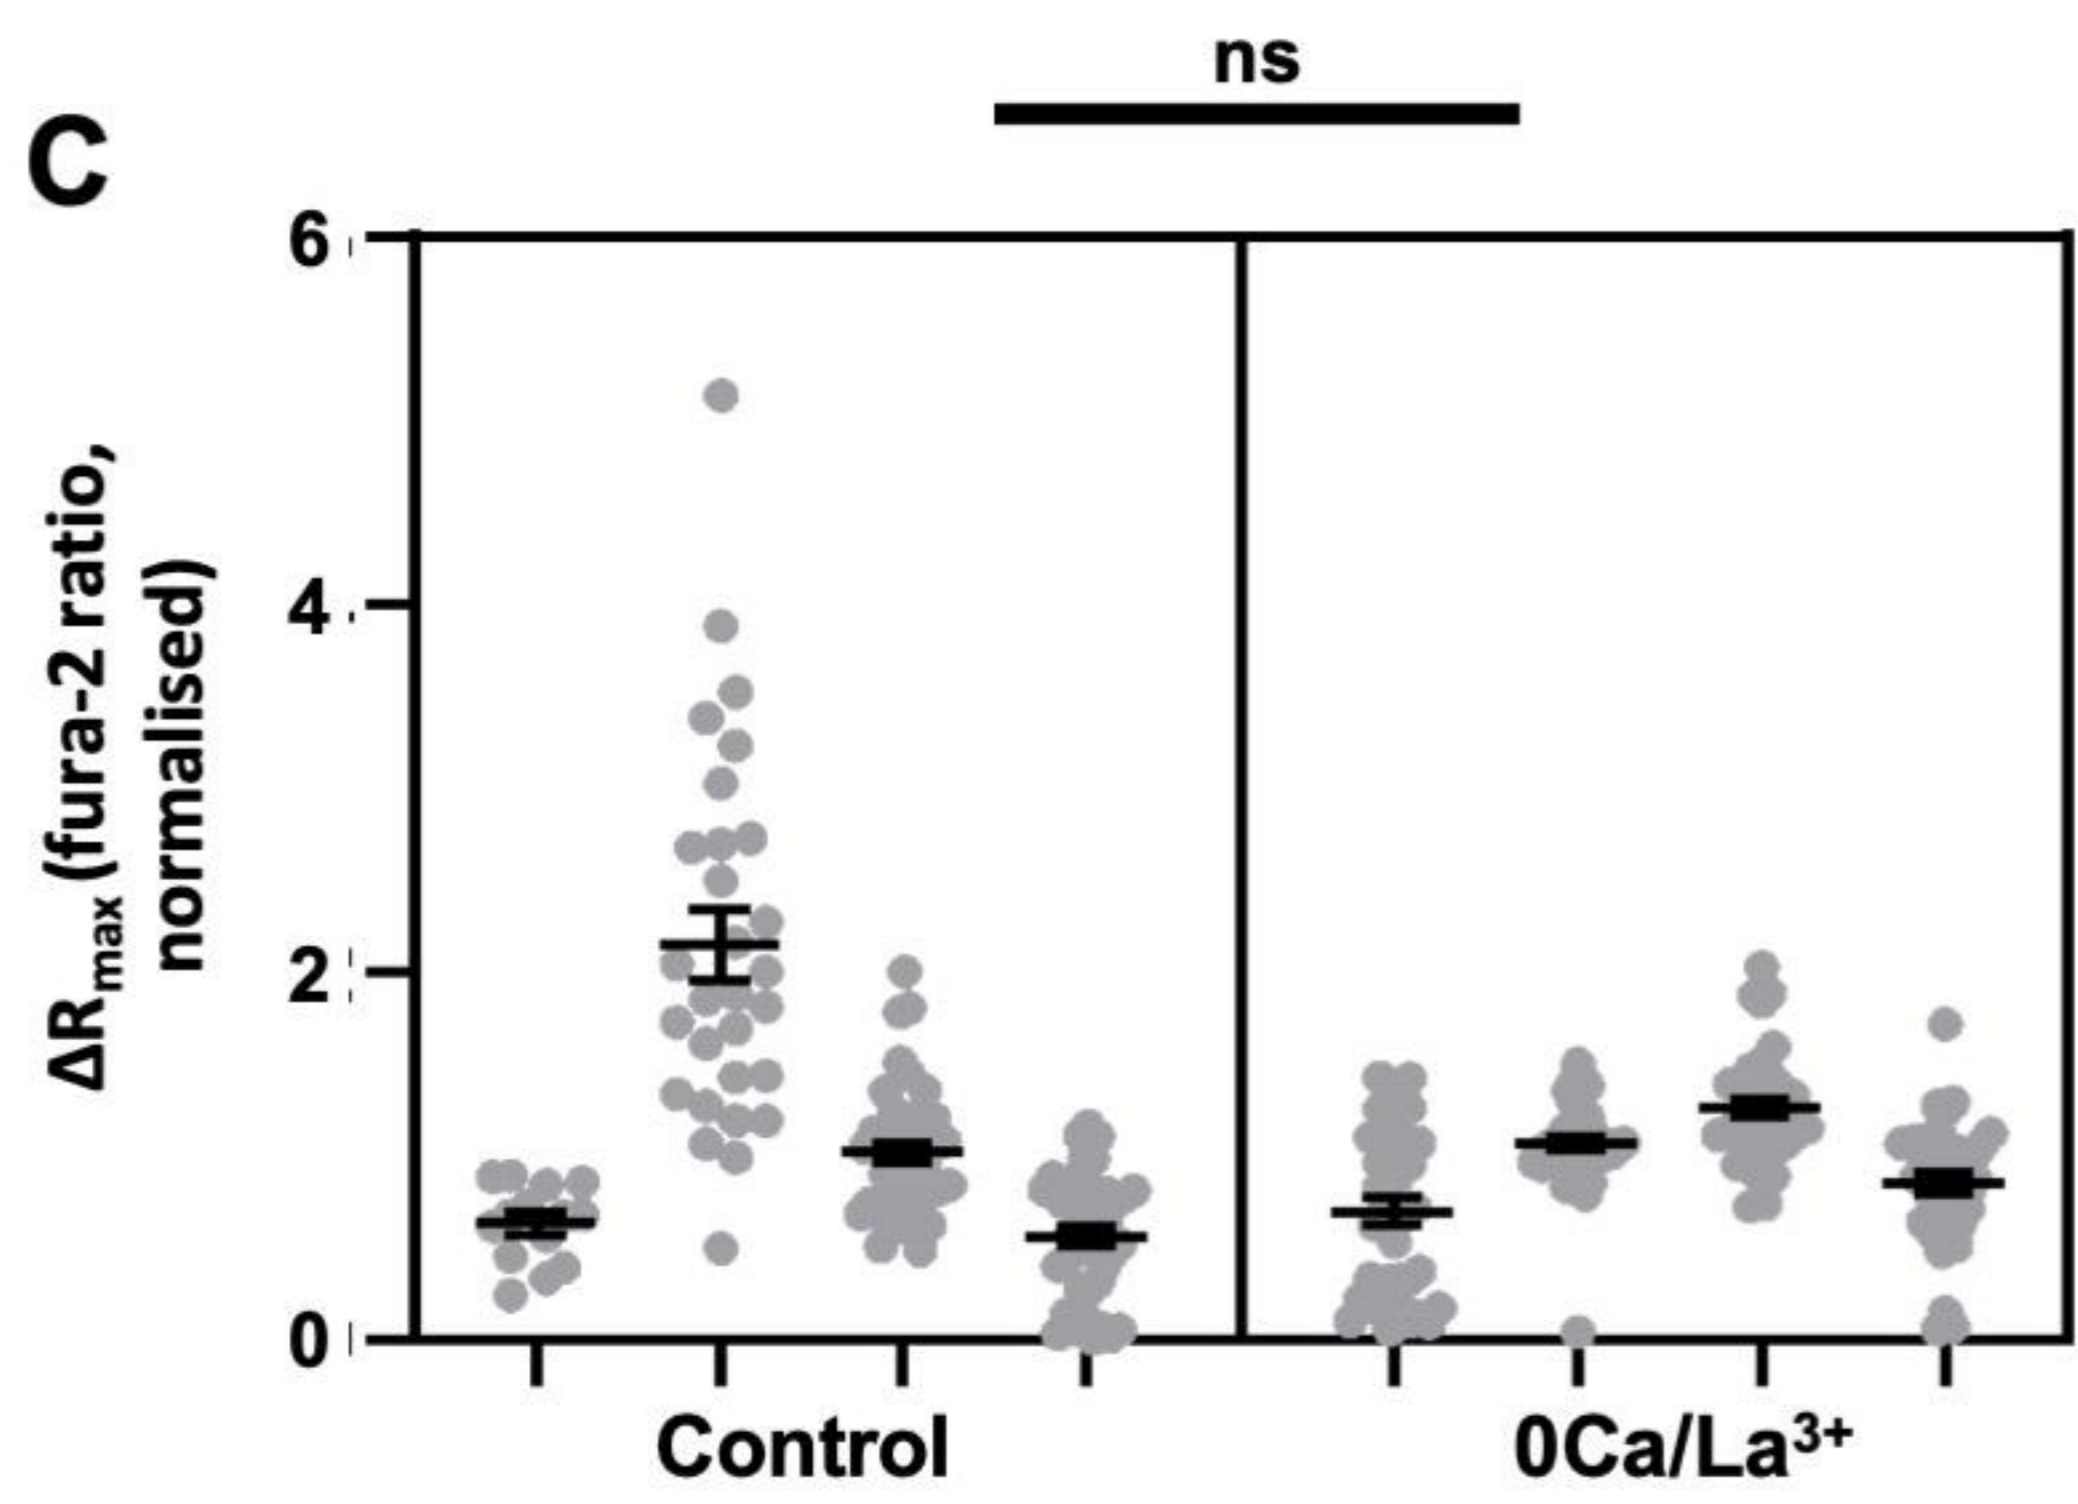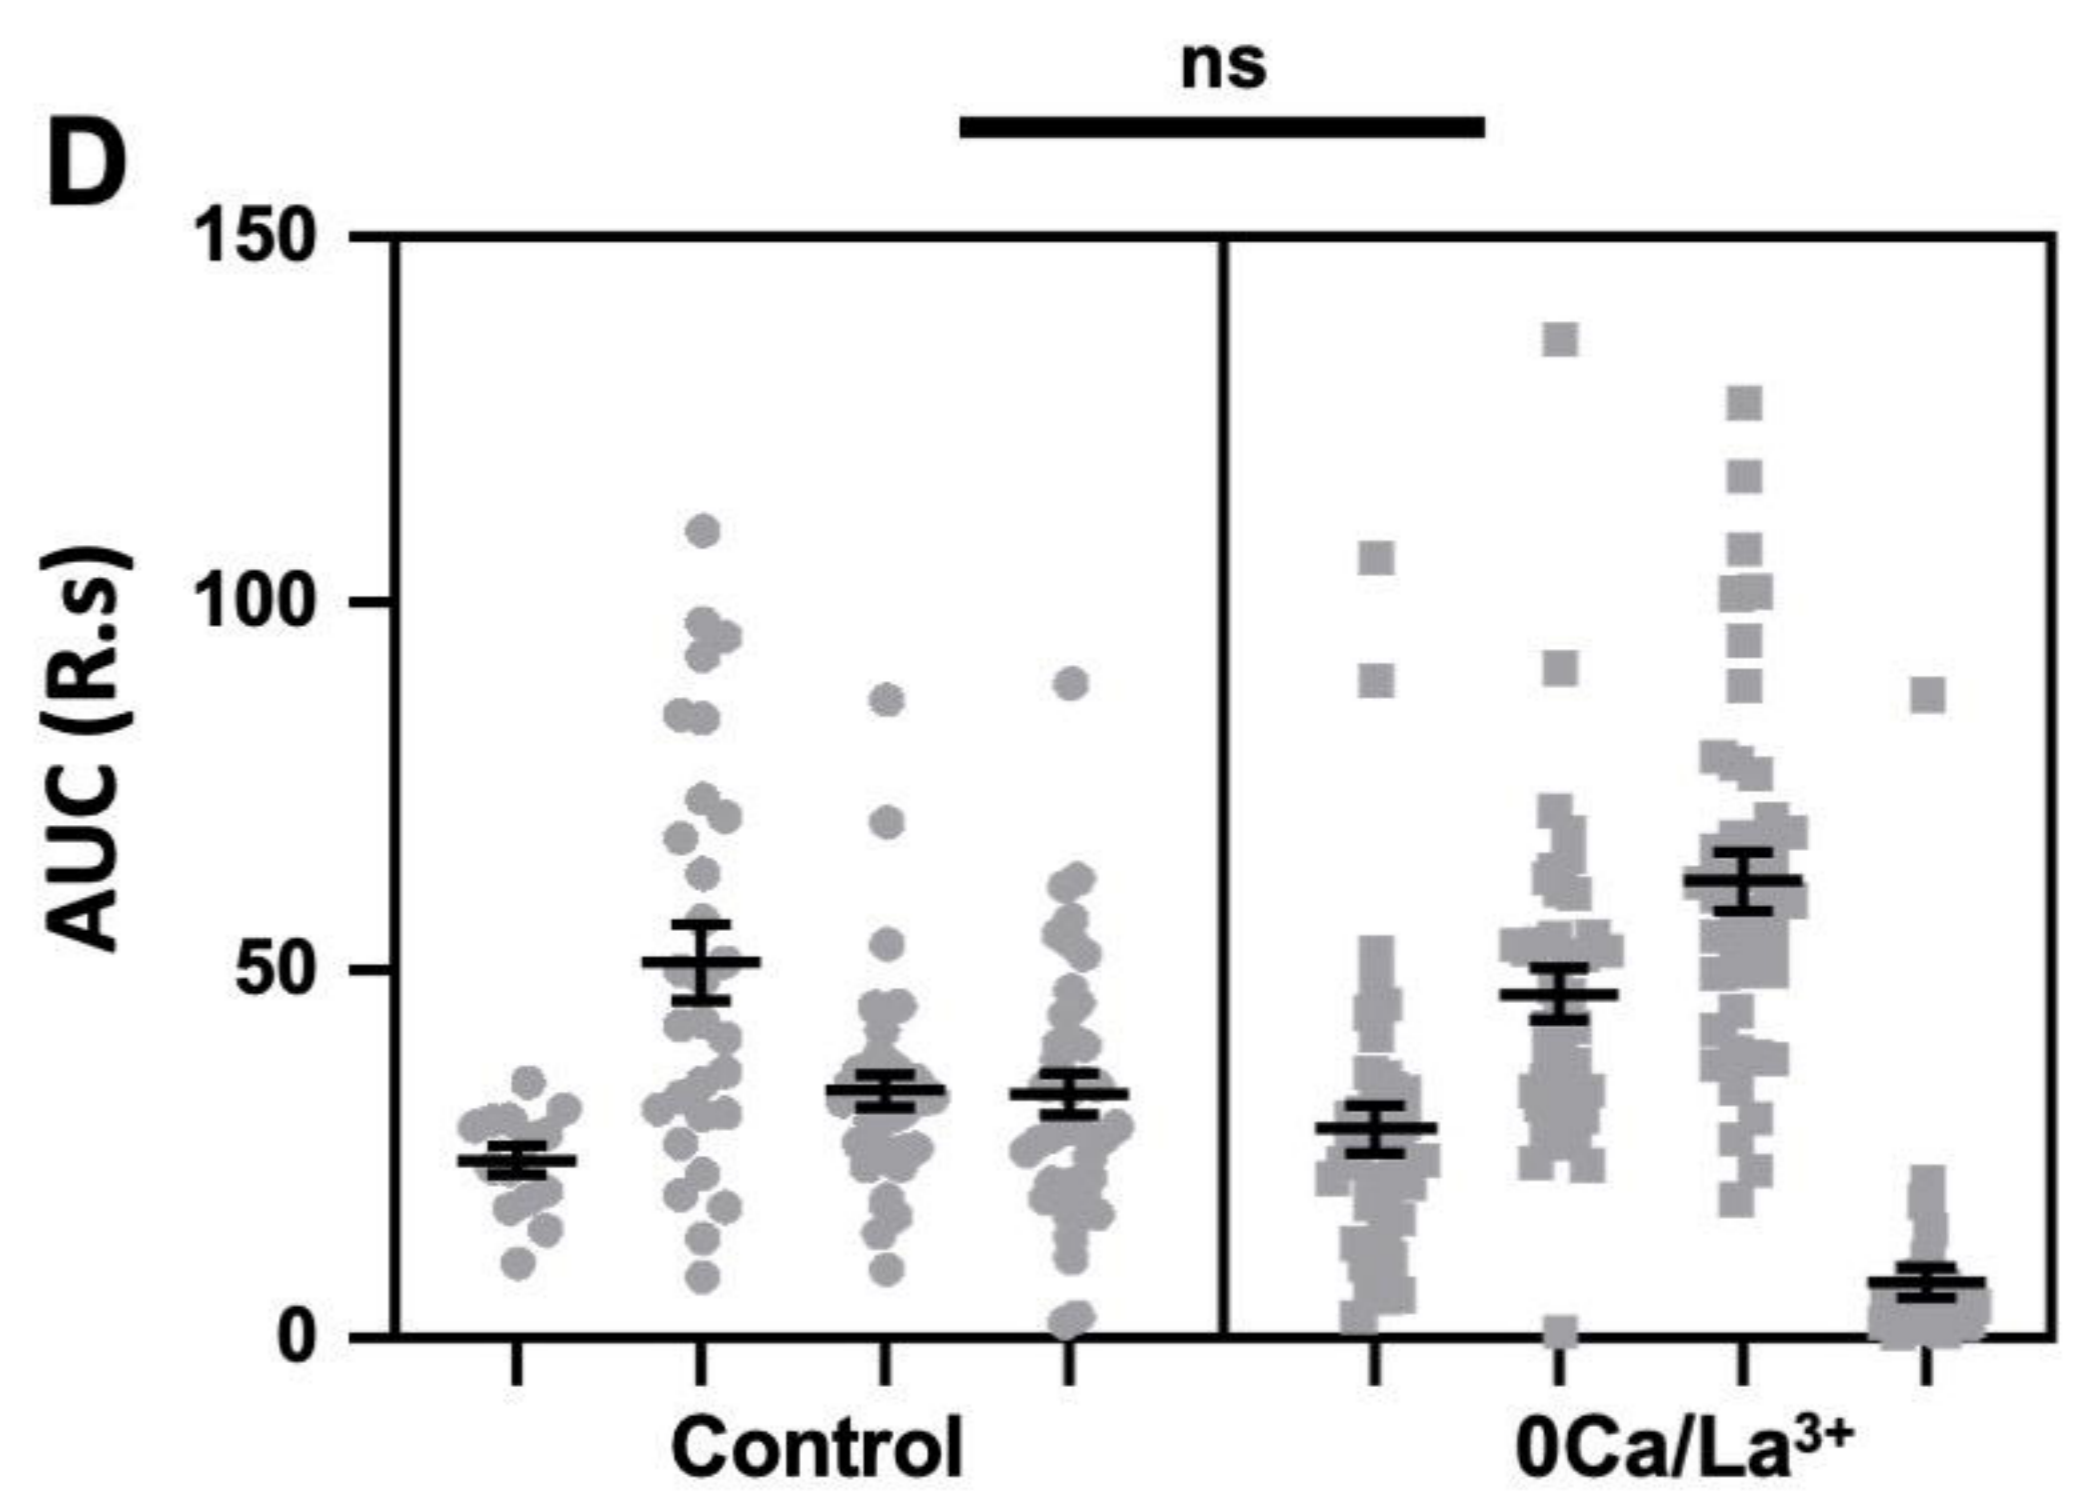

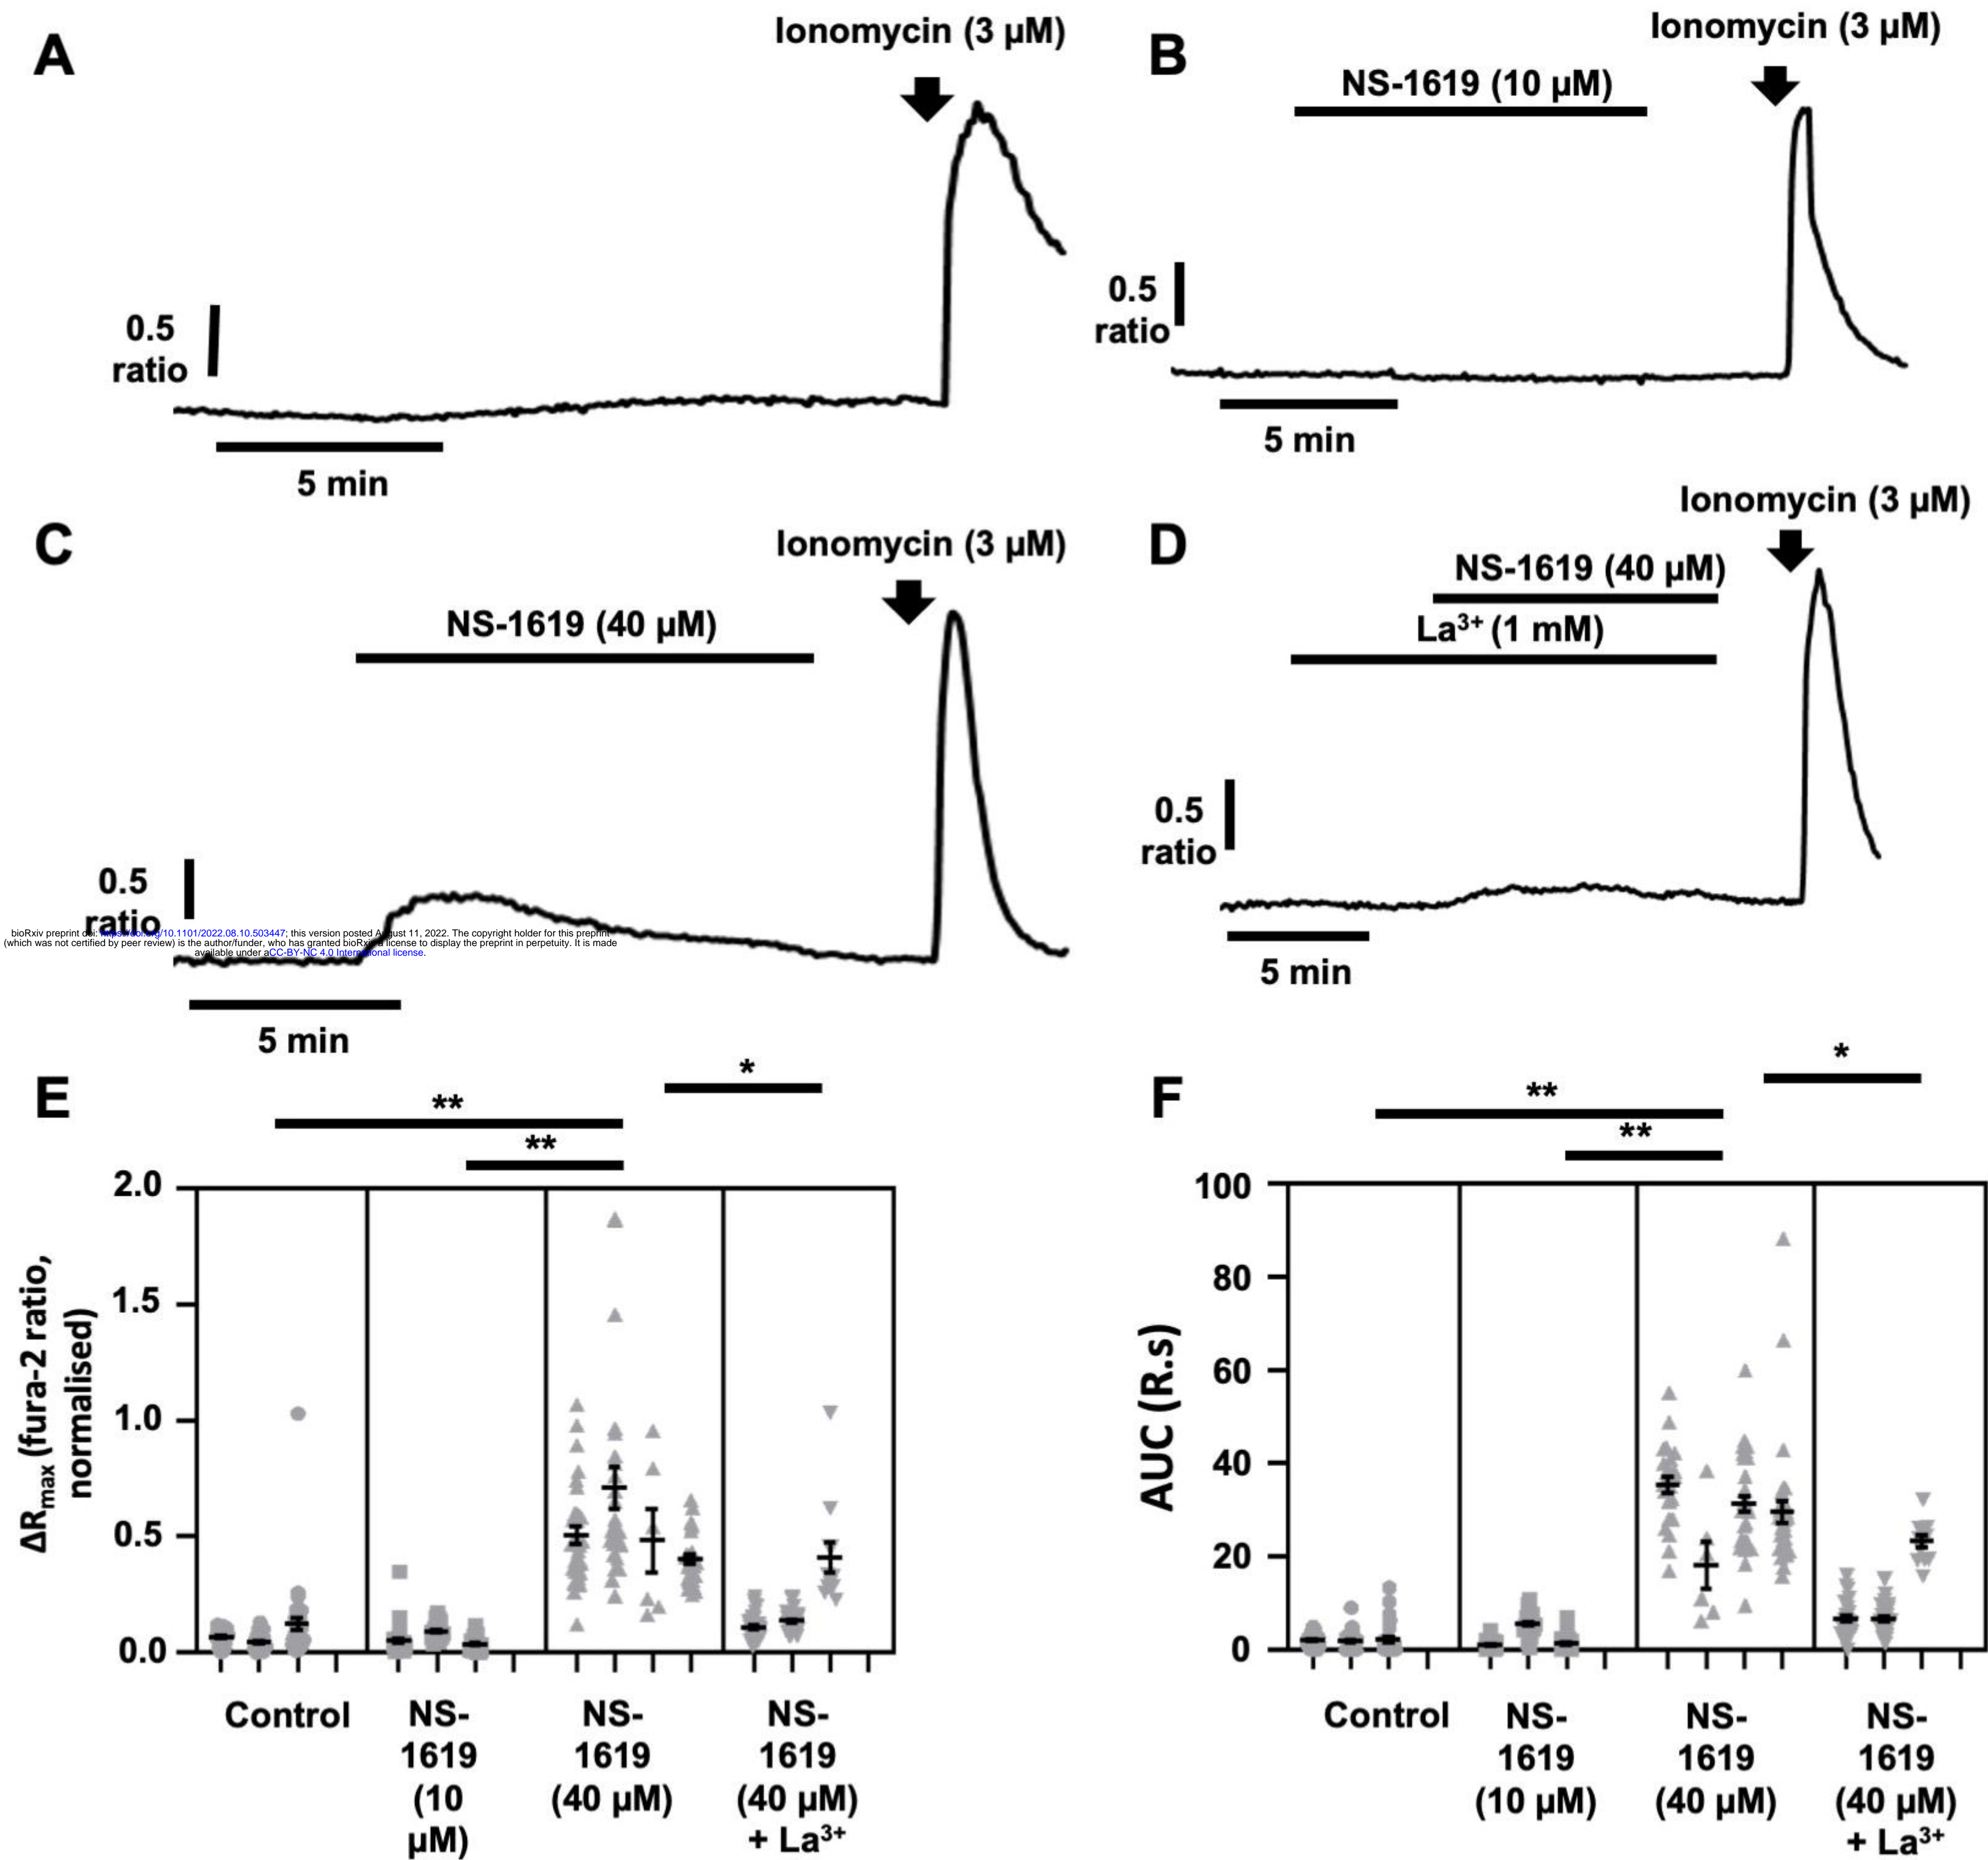

**A****0Na<sup>+</sup>/NMDG**0.5  
ratio

5 min

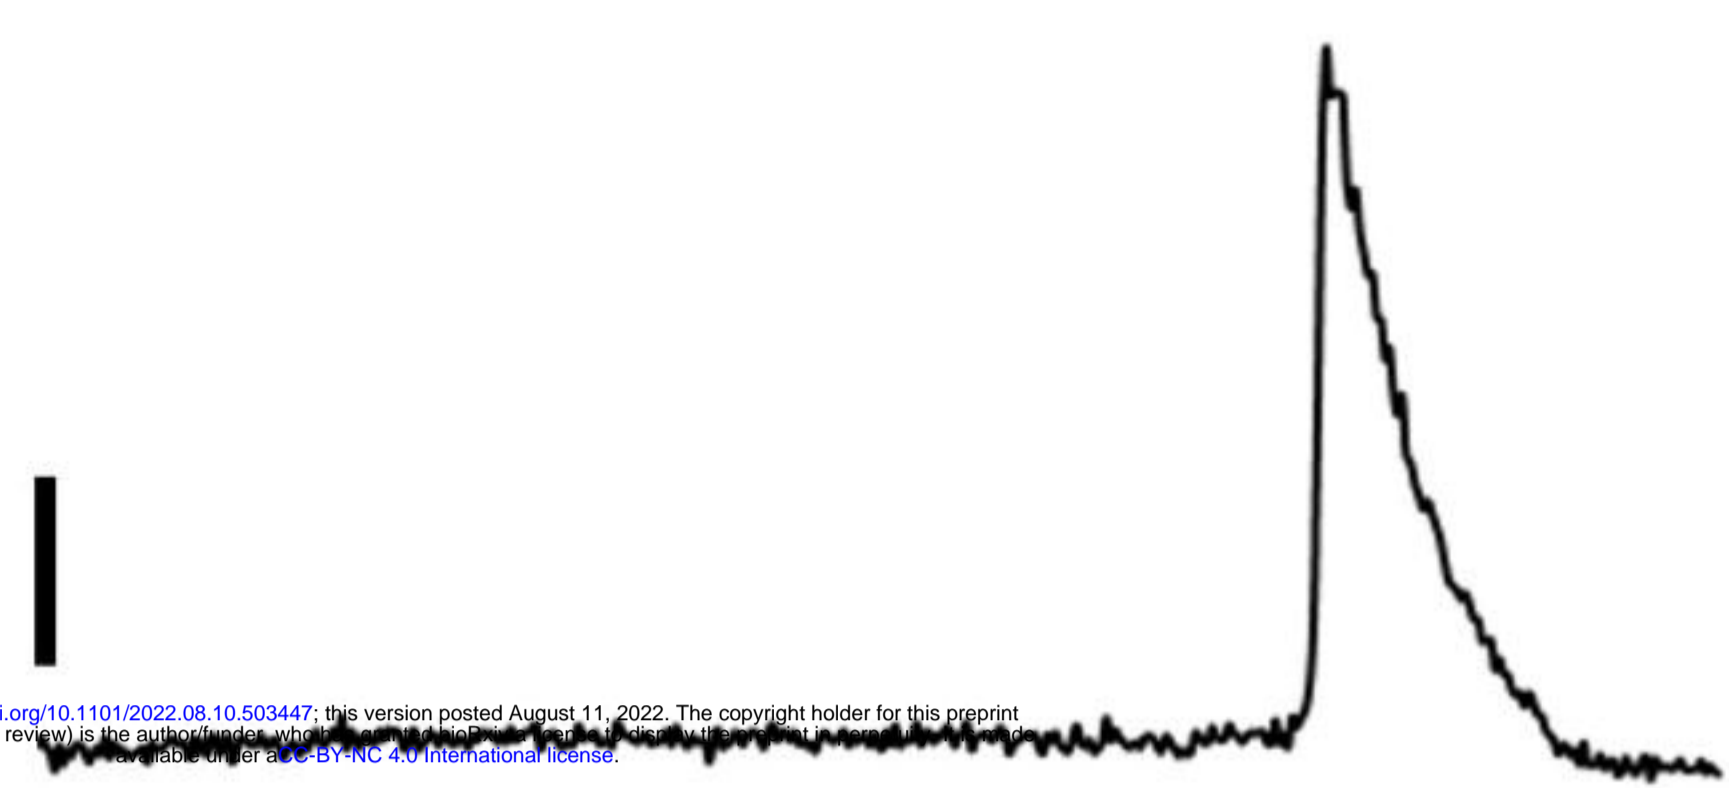

bioRxiv preprint doi: <https://doi.org/10.1101/2022.08.10.503447>; this version posted August 11, 2022. The copyright holder for this preprint (which was not certified by peer review) is the author/funder, who has granted bioRxiv a license to display the preprint in perpetuity. It is made available under aCC-BY-NC 4.0 International license.

**B****0Na<sup>+</sup>/NMDG**CPA (30  $\mu$ M)0.5  
ratio

5 min

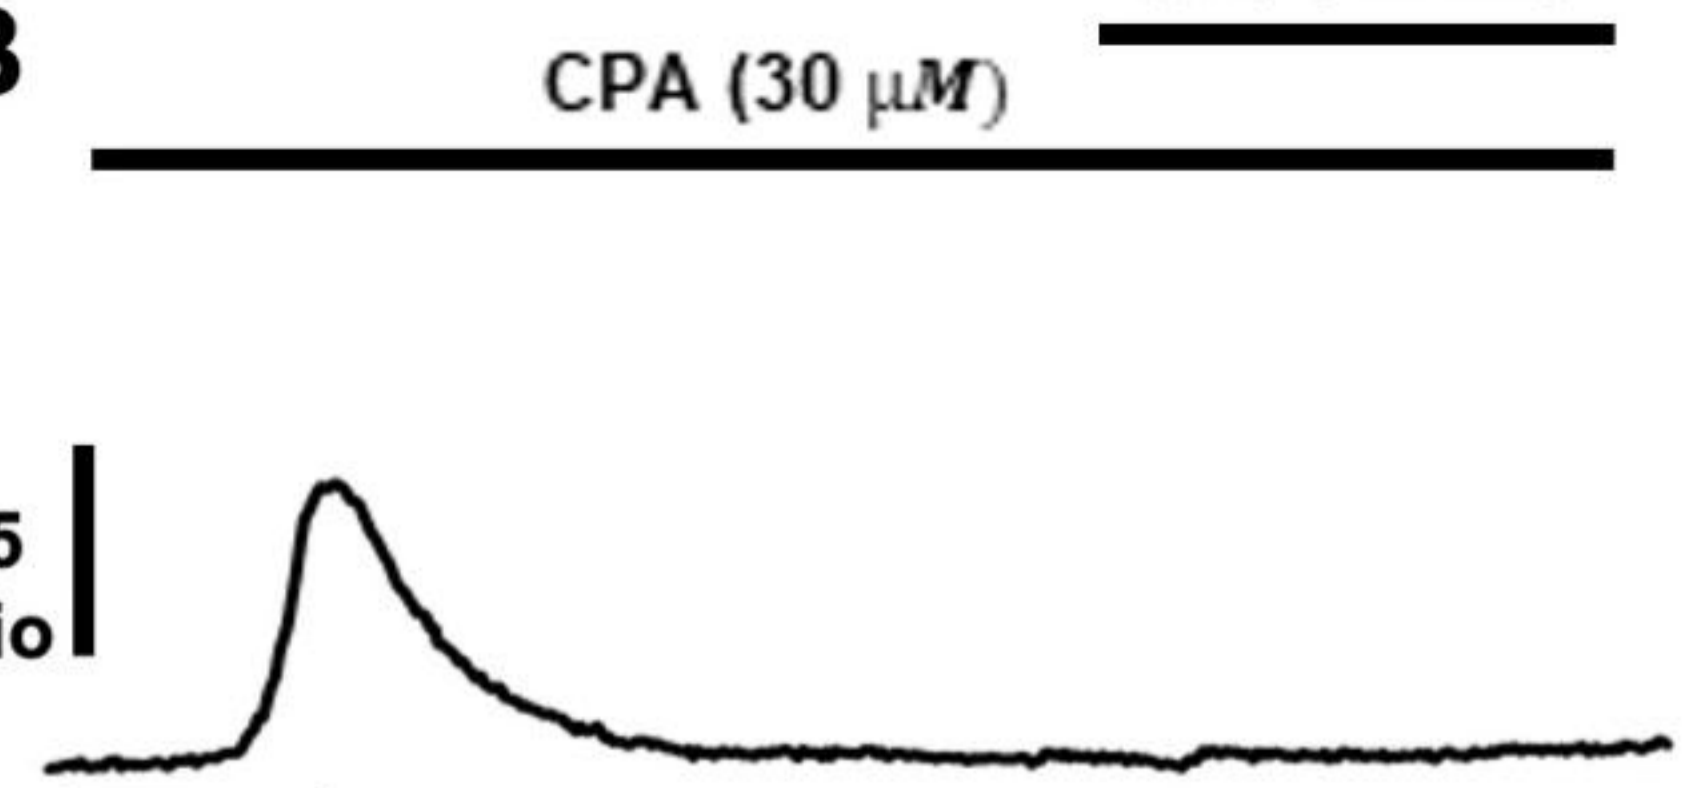**C** $\Delta R_{\max}$  (fura-2 ratio, normalised)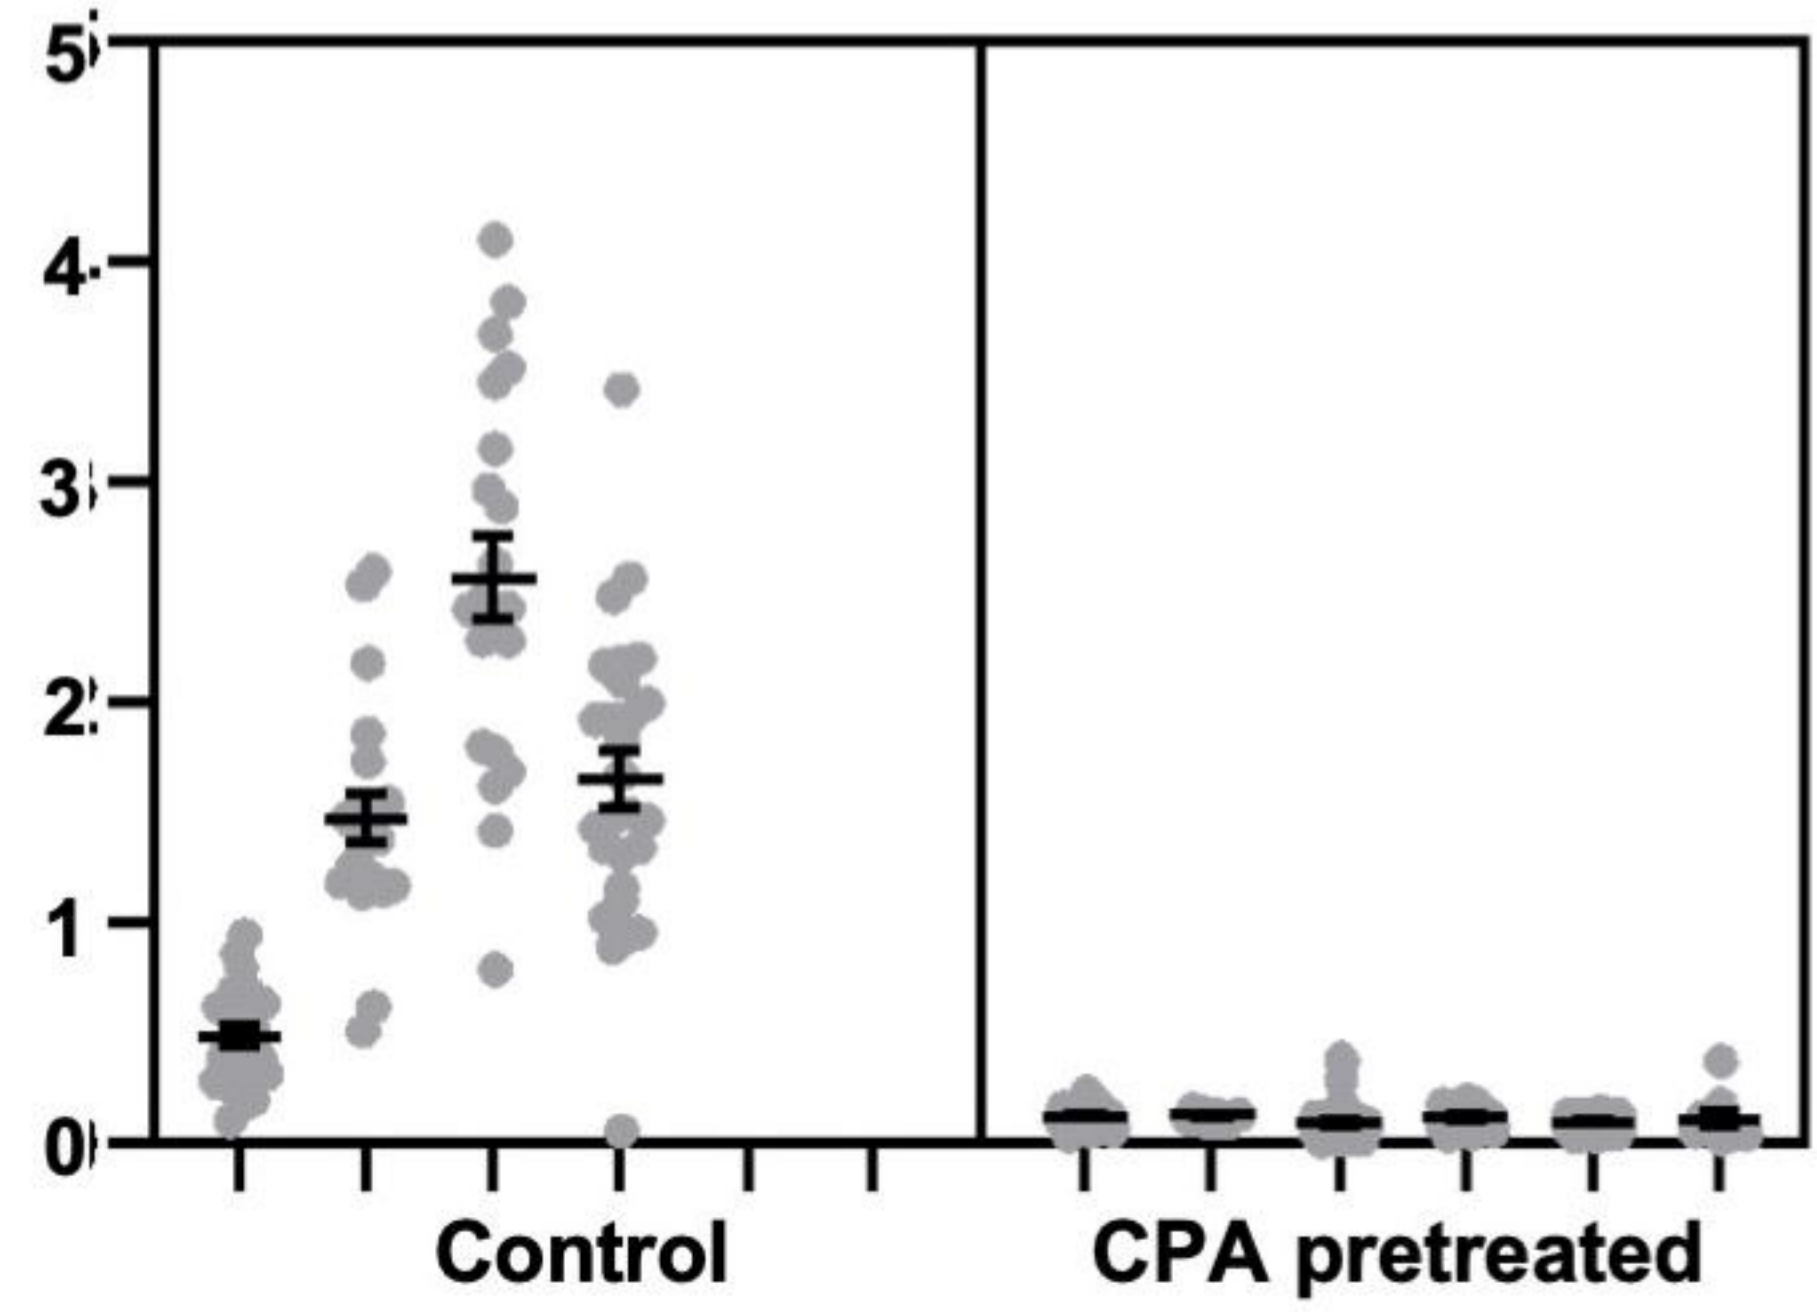**D**

AUC (R.s)

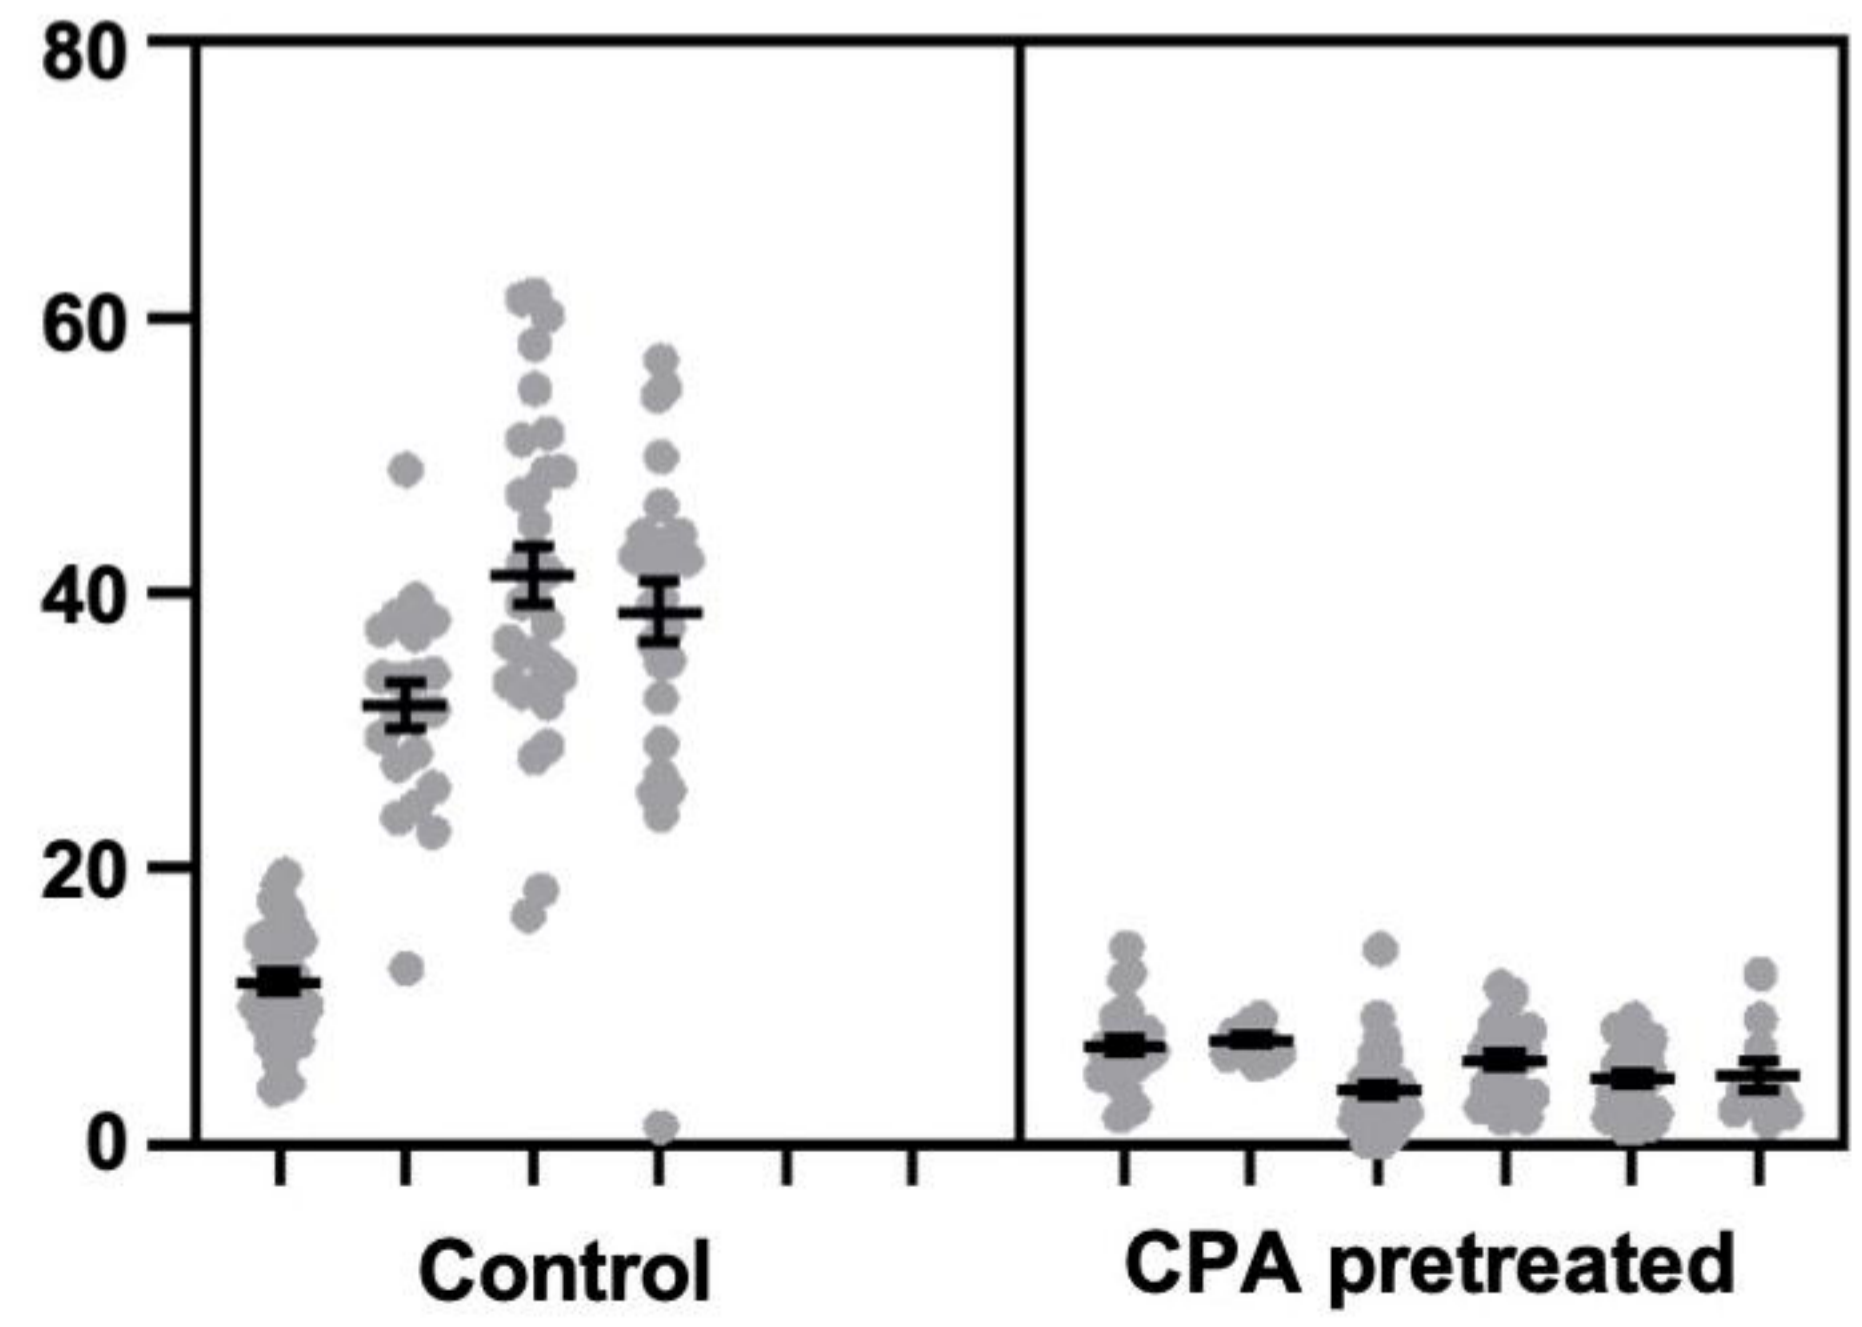

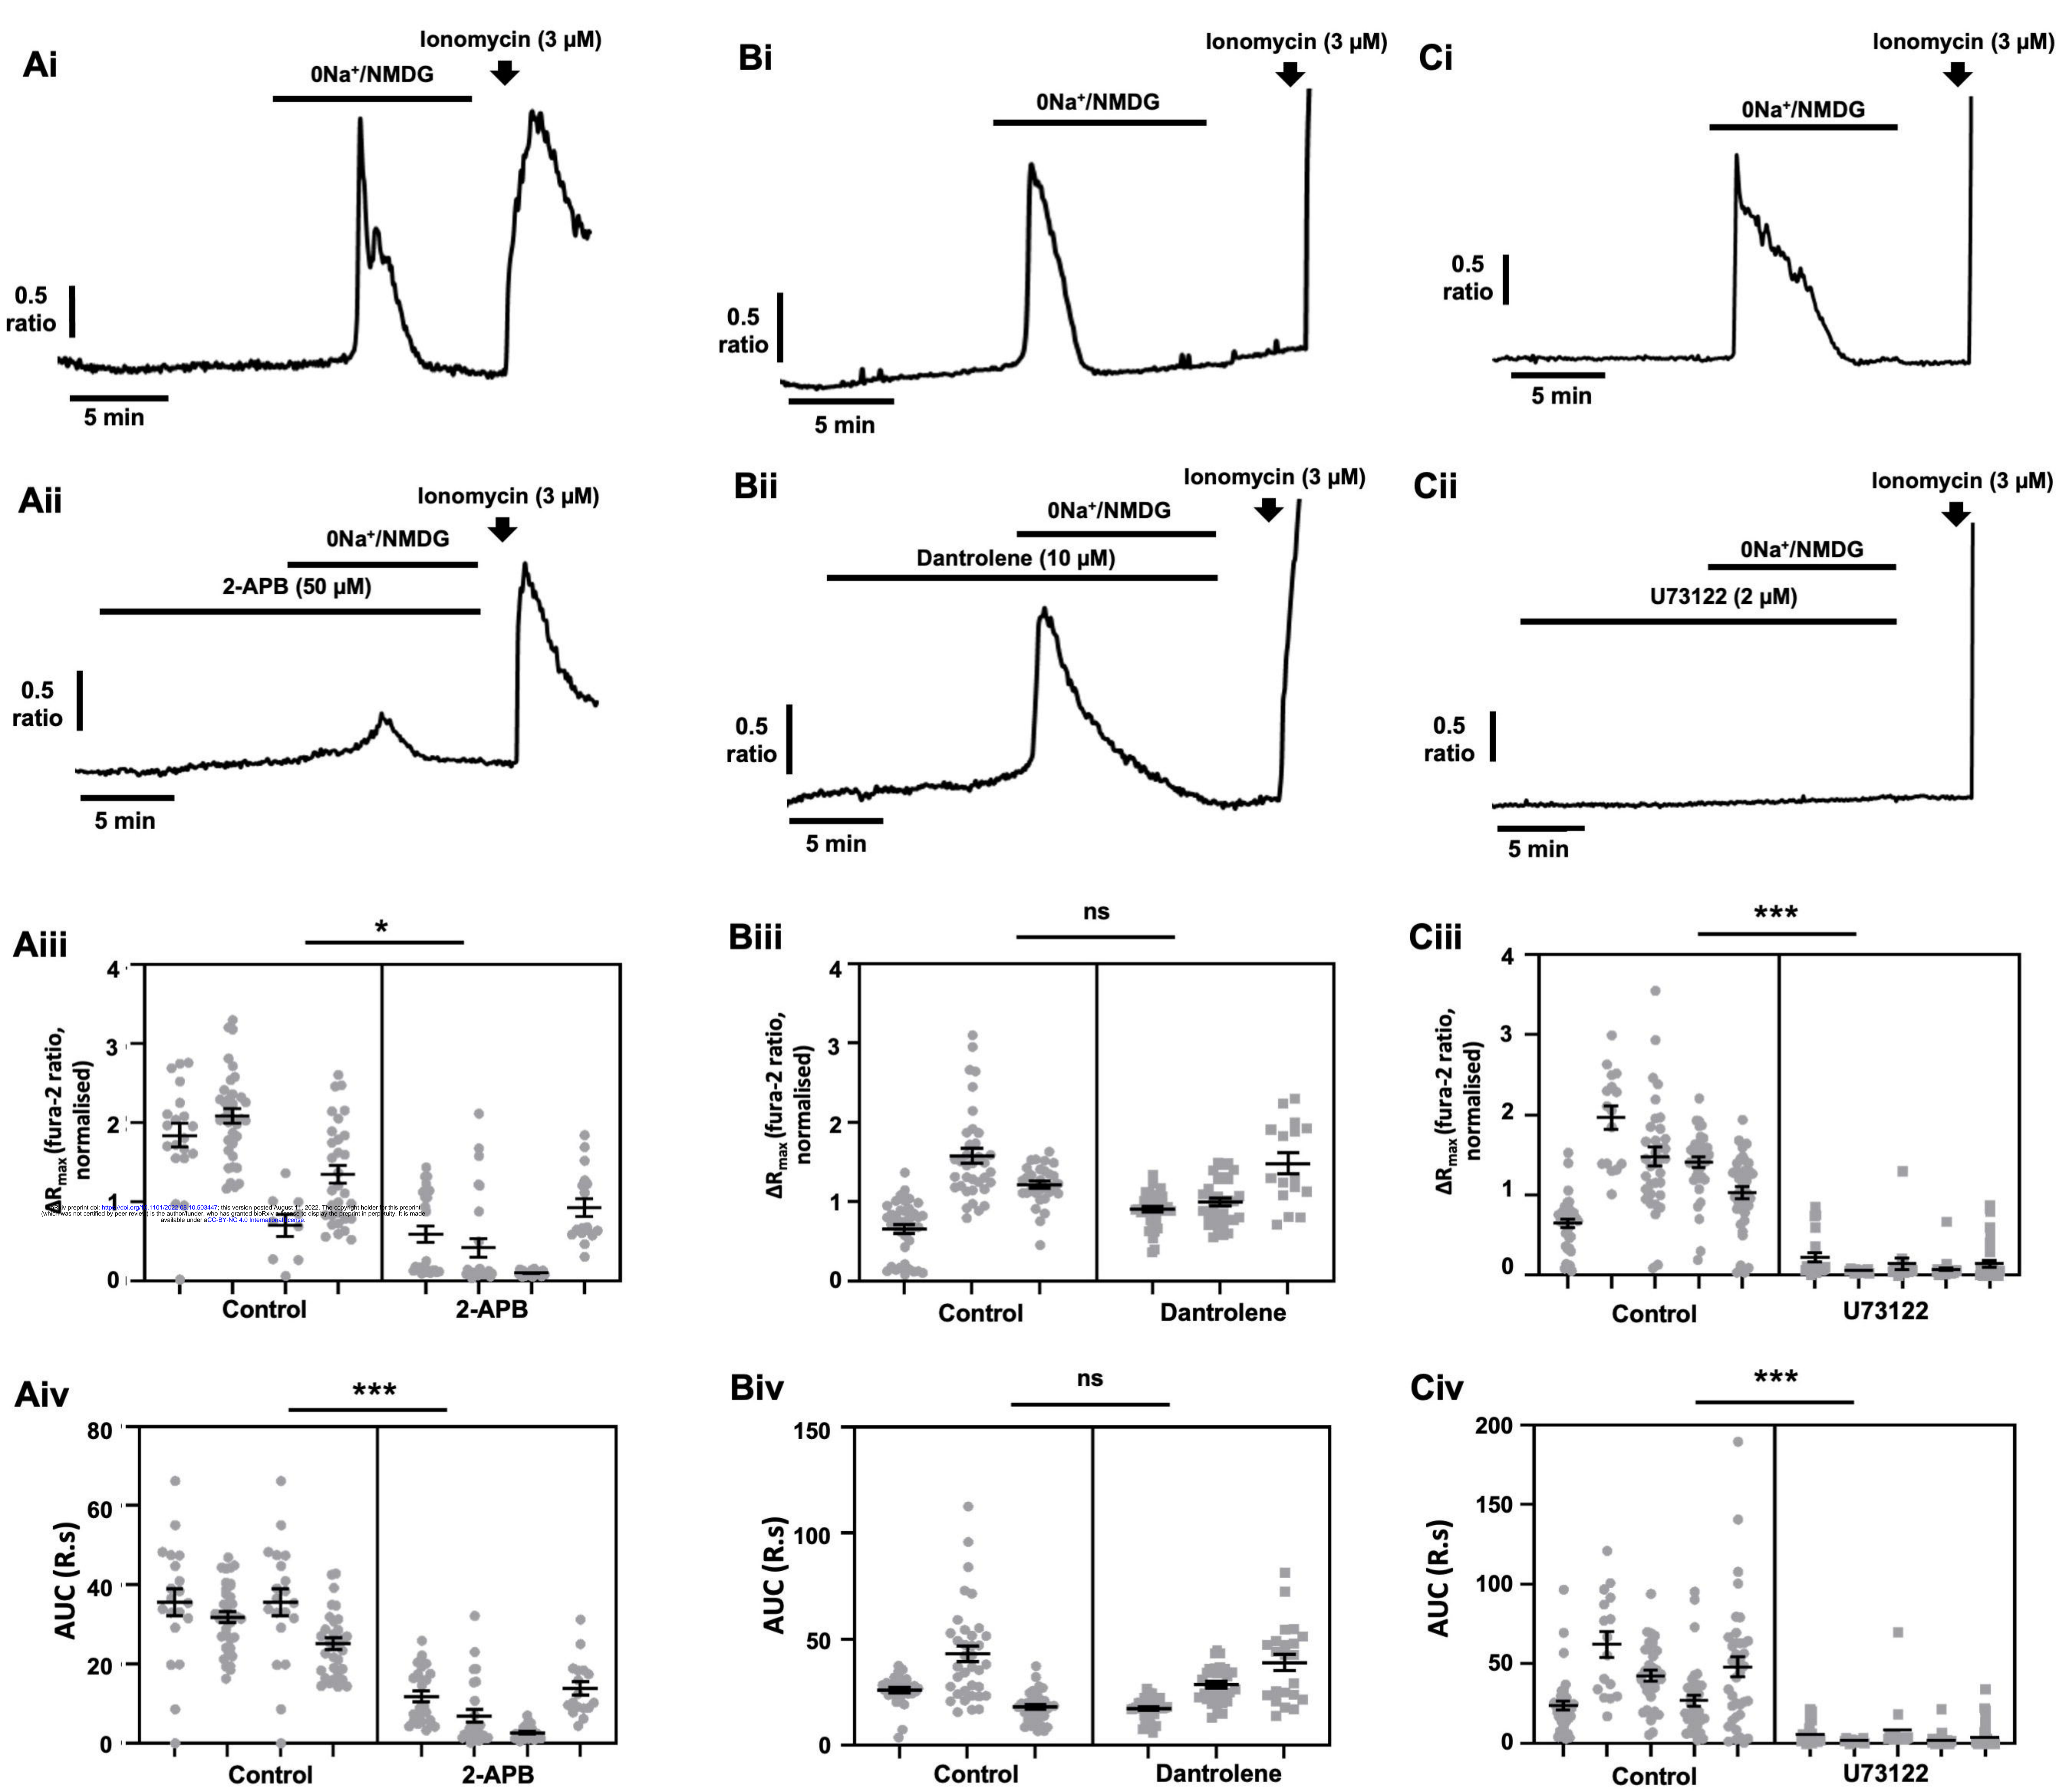

Source: http://biorxiv.org/content/10.1101/2022.08.10.503447v1.full.pdf
